1 Protein level variability determines phenotypic heterogeneity in  
2 proteotoxic stress response.

3 Marie Guilbert, François Anquez, Alexandra Pruvost, Quentin Thommen\*, Emmanuel Courtade

4 May 22, 2019

5 Univ. Lille, CNRS, UMR 8523 – PhLAM – Physique des Lasers Atomes et Molécules, F-59000 Lille,  
6 France

7 \* Corresponding Author: Quentin Thommen, E-mail: [quentin.thommen@univ-lille.fr](mailto:quentin.thommen@univ-lille.fr)

8 Subject categories: Quantitative Biology & Dynamical Systems

9 Keywords: cellular heterogeneity; Single Cell Analysis; mathematical modeling; signaling dynamics; Heat  
10 shock response.

11 Running Title: EMBO/MSB latex template

12 character count (including spaces): 43928

## 13 Abstract

14 Cell-to-cell variability in stress response is a bottleneck for the construction of accurate and  
15 predictive models that could guide clinical diagnosis and treatment of diseases as for instance  
16 cancers. Indeed such phenotypic heterogeneity can lead to fractional killing and persistence  
17 of a subpopulation of cells resistant to a given treatment. The heat shock response network  
18 plays a major role in protecting the proteome against several types of injuries. We combine  
19 high-throughput measurements and mathematical modeling to unveil the molecular origin of  
20 the phenotypic variability in the heat shock response network. Although the mean response  
21 coincides with known biochemical measurements, we found a surprisingly broad diversity in  
22 single cell dynamics with a continuum of response amplitudes and temporal shapes for several  
23 stimuli strengths. We theoretically predict that the broad phenotypic heterogeneity is due to  
24 network ultrasensitivity together with variations in the expression level of chaperons controlled  
25 by heat shock factor 1. We experimentally confirm this prediction by mapping the response  
26 amplitude to concentrations chaperons and heat shock factor 1 expression level.

## 27 Introduction

28 Resistance of a population subfraction to a cancer treatment (chemotherapy for instance) limits the effec-  
29 tiveness of this treatment (LeBlanc *et al*, 2002) and is named cellular response heterogeneity. Obviously,  
30 extracellular environment variations or genetic alterations induce cellular heterogeneity in treatment re-  
31 sponse. But several massive single-cell experimental results (Albeck *et al*, 2008; Feinerman *et al*, 2008;  
32 Gascoigne and Taylor, 2008; Orth *et al*, 2008; Irish *et al*, 2004; Cohen *et al*, 2008; Geva-Zatorsky *et al*,  
33 2006) reveal that a significant phenotypic heterogeneity persists even for monoclonal cell lines and in uni-  
34 form environment. The discovery of the underlying molecular mechanisms leading to variability in response  
35 to treatment and their potential control is a major issue for cancer therapy research (Niepel *et al*, 2009;  
36 Almendro *et al*, 2013).

37 In a clonal cell line, intracellular biochemical fluctuations create a cell population with the same genome  
38 but with various proteomes (Kærn *et al*, 2005; Sigal *et al*, 2006). Cell-to-cell variability can arise from such  
39 intracellular biochemical fluctuations and is called Non-Genetic Heterogeneity (NGH) (Huang, 2009). NGH  
40 plays a functional role in surviving unpredictable environmental changes (Kærn *et al*, 2005; Acar *et al*, 2008;  
41 Pfeuty and Thommen, 2016), and it has been identified in anticancerous treatment as a inducer of fractional  
42 killing (Spencer *et al*, 2009; Flusberg and Sorger, 2015; Roux *et al*, 2015). Accurate clinical models including  
43 NGH are still to be built in order to guide diagnosis and treatment of diseases (Bertaux *et al*, 2014). Indeed  
44 the precise knowledge of the molecular network is not enough to predict the response of a cell population  
45 to a given treatment. Such models would also require the identification of the key molecular players (Behar  
46 *et al*, 2013; Reyes and Lahav, 2018) and a detailed study of NGH (Loewer and Lahav, 2011; Altschuler and  
47 Wu, 2010).

48 A general feature of cellular stress response networks is the response-to-stimuli ultrasensitivity : the re-  
49 sponse increases slowly at low stimuli value and sharply increases to high response once a given stimulus  
50 threshold is reached. Ultrasensitivity is well known to arise from networks having either a positive coop-  
51 erativity, multistep processes or protein sequestration (Goldbeter and Koshland, 1984; Buchler and Cross,  
52 2009). Such architectures tend to shrink Cell-to-Cell Response Variability (CCRV) due to NGH for low or  
53 moderate stress strengths. In contrast, the response-to-stimuli ultrasensitivity tends to broaden CCRV once  
54 the stimulus approaches the threshold value. Stress response ultrasensitive networks are thus appropriate to  
55 study the cellular heterogeneity arising from NGH because ultrasensitivity acts as a heterogeneity amplifier.

56 The Heat Shock Response Network (HSRN) in the cytosol, together with the unfolded protein response  
57 in the endoplasmic reticulum, is essential for maintaining the proteome integrity (Morimoto, 2012). HSRN  
58 displays ultrasensitivity due to protein sequestration mechanism (Buchler and Cross, 2009; Sivéry *et al*,  
59 2016). Several proteotoxic stresses, such as oxidation or heat, trigger HSRN which induces the transcription  
60 of Heat Shock Proteins (HSPs) *via* activation of Heat Shock Factor 1 (HSF1) transcription factor. HSPs act  
61 as molecular chaperones to maintain proteostasis (Jolly and Morimoto, 2000).

62 At the single cell level, HSF1 forms dynamic structures named Nuclear Stress Bodies (nSBs) (Biamonti

63 and Vourc'h, 2010). In the present study, we first show that nSBs can be used to quantify HSRN activa-  
64 tion at the single cell level. We then use high-throughput time-lapse microscopy with a precise control of  
65 hyperthermia temporal profile (41°C-43°C) to monitor nSBs dynamics in a monoclonal population. From  
66 computational image analysis large data sets of quantitative single cell nSBs temporal dynamics have been  
67 constructed several hours after heat shock. These data allow us to shed light on an unexpected broad range  
68 of response to a given stimulus. We then address the molecular underpinnings of such CCRV in HSRN  
69 dynamics. Response variability is investigated by both statistical analysis of data and network parameters  
70 sensitivity analysis of a data-driven mathematical description of the HSRN. Using computational prediction  
71 and experimental characterization of single cells, we finally identify NGH to play a crucial role in CCRV by  
72 modulating HSF1 and HSPs concentration across the cell population.



## 73 RESULTS

### 74 Monitoring HSF1 activation of individual HeLa cells

75 Under normal conditions the molecular chaperon *heat shock protein 70 kDa* (HSP70) sequesters HSF1. Under  
76 stressful conditions HSF1 is unbound from HSP70 (Abravaya *et al*, 1992; Kline and Morimoto, 1997). Free  
77 HSF1 can form homotrimers (Sarge *et al*, 1993; Cotto *et al*, 1996) and can bind on specific region of DNA  
78 named *Heat Shock Elements* (HSE). HSF1 bound to HSE promotes the transcription of the wide family of  
79 HSP proteins that includes HSP70 and others (Mosser *et al*, 1988; Baler *et al*, 1993; Holmberg *et al*, 2002;  
80 Cotto *et al*, 1997; Boulon *et al*, 2010). In human and primate cells, free HSF1 also form *Nuclear Stress*  
81 *Bodies* (nSBs also named as *HSF1 foci*) which are reversible macromolecular complexes made of (among  
82 other macromolecules) HSF1 trimers bound to heterochromatin regions without HSE (Biamonti and Vourc'h,  
83 2010). If HSF1:eGFP binding to HSE provides an insufficient fluorescent signal to be efficiently monitored  
84 using conventional fluorescence microscopy a single nSB does (Cotto *et al*, 1997; Biamonti and Vourc'h, 2010).  
85 nSBs are formed within seconds under stressful conditions (Biamonti and Vourc'h, 2010) and form foci in  
86 the cell nucleus that can be observed under a conventional fluorescence microscope (Fig. 1 A and Cotto *et al*,  
87 1997). The quantity of HSF1:eGFP within foci can be measured over statistically significant cell population  
88 by the use of an automated images analysis. We define  $F$  as the fraction of HSF1:eGFP fluorescence signal  
89 located in foci to measure HSR activation for an individual cell.  $F$  is a ratiometric measurement proportional  
90 to the fraction of HSF1 free from HSP70.  $F$  provides a readout of HSF1 activation in individual cells (Fig. 1  
91 A).

92 In order to compare our single cell method with conventional biochemistry measurements we first study  
93 the dynamics of  $F$  averaged over the whole cell population upon a temperature rising up from 37°C to 41,  
94 42, or 43°C. As shown by Abravaya *et al*. (Abravaya *et al*, 1992) dynamics of HSF1 bound to HSE at these  
95 three temperatures deliver the big pictures of the HSR dynamics upon heat stress. Indeed the dynamics of  
96 activated HSF1 at 42°C is drastically different from the one at 43°C : at the former temperature activated  
97 HSF1 exhibits pseudo adaptation kinetics while at the later temperature HSR activation persists (Fig. 1-B).  
98 The time evolution of  $F$  average over the whole population is in very good agreement with biochemical  
99 measurements for all three temperatures (Fig. 1 C). The genetic modification resulting from the HSF1:eGFP  
100 insertion does not impact the  $F$  kinetic, as revealed by time point immunofluorescence staining measurement  
101 in wild-type HeLa (HeLa WT) cell line (see Fig. SI 1 A of the supporting information). We conclude that  
102 HSF1 foci dynamics as a valid reporter of the HSRN activation upon heat shock.

### 103 High-throughput screening of HSRN reveals broad cell-to-cell variability

104 Averaging over the cell population gives at first glance a misconception: a population of cells all having similar  
105 foci intensity whose brightness increases with stress amplitude. Examining the time traces of individual cells  
106 with identical genome and exposed to the exact same stimulus reveals that this picture is not correct. One

107 easily distinguishes a broad cellular heterogeneity both in foci intensity and dynamics (Fig. 2 A-C). These  
108 experimental results were confirmed using a second monoclonal cell line (see Fig. SI 3 of the supporting  
109 information). Besides no spatial dependency was found for the amplitude neither the shape of the response.  
110 This confirms that heterogeneity is not due to a spatial distribution of the temperature across the sample  
111 nor any other imaging artifact. Although HSF1:eGFP expression level varies significantly from cell-to-cell  
112 the total HSF1:eGFP amount in a single cell does not vary during the experiment and then does not impact  
113 the foci dynamic (see Fig. SI 2 A-C of the supporting information).

114 If we now focus on the response at a given time (one hour after the stress onset) we observe a significant  
115 fraction of cells that do not display detectable foci (78.4 % at 41°C, 50.5 % at 42°C, and 19.7 % at 43°C)  
116 while the responding subset displays a wide distribution of free HSF1 with  $F$  ranging from 0 to nearly 0.5  
117 (Fig. 2-D). These numbers suggest that the rise of response amplitude with increasing temperature observed  
118 at the population level (Fig. 1 B and C) is at least partially due to an increase of the fraction of responding  
119 cells rather than solely due to an absolute increase in free HSF1 fraction per cell. Similar results are obtained  
120 with wild-type HeLa cell line (see Fig. SI 1 B of the supporting information).

121 The temporal shape of the response also varies across the cell population. We observe cells exhibiting  
122 complete relaxation and cells with  $F$  monotonously increasing. To capture the heterogeneity of HSF1  
123 activation dynamics we define a relaxation index  $\eta$  as the ratio of the response at 1h to the one at 3h post  
124 heat shock (Fig. 2-E).  $\eta = 0$  indicates a near perfect adaptation ;  $\eta = 1$  translates into a plateau ; and  
125  $\eta > 1$  is a sign of continuously increasing activation. It is worth noting that some cells exposed to step  
126 temperature increase at 42°C show dynamics comparable to the population average at 43°C and *vice versa*.  
127 Indeed nearly 10 % of the responding cells have a relaxation index  $\eta > 1$  for 42°C heat shock whereas 10 %  
128 of the responding cells shows a relaxation index  $\eta < 0.5$  at 43°C. Finally we note that the temporal shape  
129 of the response is positively correlated with the  $F$  value one hour after the stress onset: the brighter is the  
130 foci the less pronounced is the relaxation (see Fig. SI 2 D-F of the supporting information).

## 131 **Variation of protein basal expression level can induce heterogeneous cellular** 132 **response**

133 One surprising feature of our single cell dataset is the apparently continuously varying behavior across the  
134 cell population (Fig. 2 A-C). Our attempts to apply statistical clustering methods to each dataset could  
135 not converge towards a finite number of phenotypes. A situation with only two clusters corresponding to  
136 the responding cells, on the one hand, and undetectable responses, on the other hand, is not satisfying  
137 as it would hide heterogeneity in the former class. We concluded that the variety of kinetic traces could  
138 not be captured by a discrete set of typical behavior. At the network level HSR is characterized by two  
139 competitive sequestration mechanisms. The output of such motif is known to be highly sensitive to protein  
140 concentration (Goldbeter and Koshland, 1984; Buchler and Cross, 2009). To explain the observed hetero-  
141 geneity we hypothesized that a variation in basal protein expression level across cell population could lead

142 to significant differences in cellular responses. Indeed protein expression levels vary from one cell to another  
143 even in a monoclonal cell line. This can be due to the stochastic expression of the gene (Sigal *et al*, 2006) or  
144 asymmetric cell division (Neumüller and Knoblich, 2009). To assess this possibility and gain understanding  
145 on the origin of CCRV we derived a coarse-grained mathematical model of the HSR network.

146 In a minimal description HSRN involves three different species : (i) MisFolded proteins (MFP) that  
147 are heat-induced and (ii) HSP which helps to refold MFP and (iii) HSF1 that promotes transcription of  
148 HSP. The dynamics of the network is mainly regulated by two complexes that both involve the chaperon  
149 HSP (Sivéry *et al*, 2016) : HSPs titrate the MFP on the one hand and its own transcription factor (HSF1)  
150 on the other. Our model accounts for the temporal evolution of copy number of four molecular species (MFP  
151 ; HSP mRNA ; HSF1 ; HSP). The model is using ordinary differential equations where the fast dynamics  
152 of molecular complex assembly and disassembly are adiabatically eliminated (see Material and Methods for  
153 details). We also account for the measured temperature rise time of the incubator. The coarse-grained  
154 model is accurate enough to quantitatively describe the foci dynamics (see Fig. SI 4 of the supplementary  
155 information for comparison to experimental data and parameters estimation).

156 Using the above describe mathematical model, we show that reducing or increasing by only two fold the  
157 basal HSP concentration is sufficient to qualitatively mimic the dynamics of  $F$  (Fig. 3 A-C and D-F compared  
158 to Fig. 2 A-C). In our mathematical framework the response heterogeneity is captured as a consequence of  
159 protein copy number variability : the more is the HSP number, the less is the foci intensity ( $F_{th}$ ) and the  
160 lower is the relaxation index ( $\eta_{th}$ ). Moreover the population level observations are also predicted : (i) both  
161  $F_{th}$  and  $\eta_{th}$  increase with temperature and (ii) the temporal shape the foci intensity display more relaxation  
162 ( $\eta_{th} < 0.5$ ) at 41°C and 42°C than 43°C ; a plateau or a slow increase ( $\eta \geq 1$ ) is observed mostly at 43°C.  
163 Similar *in silico* results were obtained by varying HSF1 concentration (see Fig. SI 5). We conclude that  
164 variations of both HSF1 and HSP expression levels could lead to the experimentally observed CCRV.

165 One of the major advantage of our model is that it provides an explicit analytical expression for the  
166 foci intensity  $F_{th}(t)$  at any time  $t$  after the stress onset (Eq. 8).  $F_{th}(t)$  depends on the concentration of the  
167 three main molecular actors, namely HSP, HSF1 and MFP. Mapping  $F_{th}$  as a function of HSP and HSF1  
168 concentrations reveals iso-response lines (Fig. 3 G-I). Such a mapping can be used to test the theoretical  
169 prediction experimentally.

## 170 **HSP72 and HSC70 expression level impact cellular response and lead to cell-to-** 171 **cell heterogeneity of the HSR**

172 Modeling results suggest that both HSP and HSF1 level variations may induce the observed cell-to-cell  
173 variability in response to heat stress. Therefore in order to test our theoretical predictions we use immunola-  
174 belling and fluorescence microscopy to measure simultaneously HSP and HSF1 concentrations together with  
175 the response  $F$  at the single cell level. Our model assumes a generic HSP while the HSP family is wide  
176 an comprise several variants with specific roles (Whitley *et al*, 1999). However only the HSP70 subfamily

177 appears to play a significant role in HSF1 titration and consequently in its activation (Shi *et al*, 1998). We  
178 thus consider only two members of the HSP family : HSP72 and HSC70. Both proteins play a similar role  
179 in sequestering HSF1 and the refolding of MFP (Gething and Sambrook, 1992), but HSP72 is a stress  
180 inducible protein (the transcription rate of *hsp72* mRNA increases with the free concentration of HSF1)  
181 whereas HSC70 is not stress induced and constitutively expressed (Tavaria *et al*, 1996).

182 In a first step we estimated HSF1, HSP72 and HSC70 concentration in individual cells from single  
183 immunolabeling in both HeLa Wild Type and in HeLa-HSF1:GFP cell lines. Experimental data were  
184 compared for two thermal conditions : without heat shock and one hour after exposure to a temperature  
185 step-up from 37°C to 43°C (Fig. 4 A-C). As HSF1 is located in the cell nucleus (see (Mercier *et al*, 1999  
186 and Fig. 1 A) we focus on nuclear concentration for all three proteins. We used Hoechst staining of cellular  
187 DNA to allow automated cell segmentation of the cell nucleus. All three protein concentrations at both  
188 37°C and 43°C are well fitted by a log-normal distribution (see Fig. SI 6 of the supporting information).  
189 As expected only HSP72 exhibits a shift of the distribution upon heat stress (Fig. 4 B). The HSF1:eGFP  
190 insertion induces an overexpression of both HSF1 and HSP72 (1.46 for HSF1 and 1.65 for HSP72) but has  
191 no effect on HSC70. HSF1:eGFP insertion also induces a broadening of the HSF1 and HSP72 distribution  
192 especially toward higher values for both species.

193 In a second step we quantify the influence of HSP and HSF1 expression levels on the response ampli-  
194 tude. To do so in HeLa WT cells we estimate HSF1 and HSP72 (or HSC70) concentrations *via* double  
195 immunolabeling. One hour after exposure to a step temperature increase at 43°C we measure  $F$  for the whole  
196 cell population from HSF1 immunolabel. We then compute the population average of  $F$  ( $\langle F \rangle$ ) conditional  
197 to a given value of HSF1 and HSP72 immunofluorescence signals (Fig. 4 D). In agreement with the model  
198 prediction (Fig. 3)  $\langle F \rangle$  increases with HSF1 level and decreases with HSP72 level. In contrast no significant  
199 correlation is found between  $\langle F \rangle$  and HSC70 protein expression level (Fig. 4 E).

200 As shown above (Fig. 4 A-C) the HSF1:eGFP insertion increases the number of cells having higher con-  
201 centration of HSF1 and HSP72. We perform HSP72 (or HSP70) immunolabeling in HeLa HSF1:eGFP one  
202 hour after exposure to a temperature step-up from 37°C to 43°C to compute maps similar as in (Fig. 4 D-E)  
203 with a stretched variability in proteins distribution (Fig. 4 F-G). In this case we monitor HSF1:eGFP fluores-  
204 cence to measure HSF1 expression level and  $F$ . The stretched protein distribution makes the dependence of  
205  $\langle F \rangle$  on HSP72 protein expression level even more obvious. Immunolabelling of HSC70 reveals a dependence  
206 of  $\langle F \rangle$  also on HSC70 concentration. Importantly we note that the average  $F$  value is similar in HeLa WT  
207 and in HeLa HSF1:eGFP experiments for a given HSF1-HSP couple. The mapping of  $F$  conditional to  
208 HSF1 and HSP concentration in HeLa HSF1:eGFP cells allows us to monitor rare events in which HSF1 and  
209 HSP72 concentration are higher.

210 We finally compute the percentage of the  $F$  dispersion explain by Eq. 8 by using InterQuartile Range  
211 (IQR) as a measurement of the data dispersion. We apply the procedure on data obtained with HeLa  
212 HSF1:eGFP cell line because the protein distributions are broader, and thus less sensitive to noise estima-

213 tion of  $F$ . It turns out that Eq. 8 explain 52% of the dispersion by mapping  $F$  with HSF1 and HSP72  
214 concentrations and 43.3% of the dispersion by mapping  $F$  with HSF1 and HSC70 (see Fig. SI 7 of the  
215 supplementary information). We note that the value of the exponent 3 (which reflects HSF1 trimerization)  
216 in Eq. 8 is crucial to explain the data dispersion (see SI 8 of the supplementary information). Indeed without  
217 it the percentage explaining  $F$  distribution falls to 41% with HSF1 and HSP72 and to 0% with HSF1 and  
218 HSC70.

## 219 DISCUSSION

220 This study aims to better understand the molecular origin of phenotypic heterogeneity that will be crucial  
221 to work around resistance of a sub-population of cells upon cancer treatment. We also provide here a test  
222 for predictability of phenotypic heterogeneity by a mathematical model of the HSRN. We focus on HSRN  
223 because most anti-cancer treatments will activate this stress response. Moreover HSRN is a good model  
224 system as it is well characterized in the literature and heat shock provide a homogeneous way to treat an  
225 entire cell population.

226 We combine high-throughput single-cell fluorescence experiments and mathematical modeling of the  
227 genetic regulation network. We first highlight an unexpected wide cell-to-cell variability in the activation  
228 of HSRN. We show that variability of the heat stress response is largely the result of cell-to-cell basal  
229 HSPs level heterogeneity. Surprisingly only a narrow variation in HSPs basal level is sufficient to induce the  
230 observed cell-to-cell variability. In the model, heterogeneity amplification is induced by the sequestration  
231 mechanism at the core of HSRN activation. Immunofluorescence labeling experiments confirm that such an  
232 HSP expression level distribution explains a significant fraction of the heterogeneity and that the response  
233 amplitude depends on HSP expression level *via* the predicted mathematical relationship.

234 The response continuum observed in HSRN activation is a novel and surprising result that both completes  
235 the well-established biochemical data in the field and renew their interpretation. Owing to the fact that  
236 sequestration cascade leads to response hypersensitivity this sequestration cascade induces a heterogeneity  
237 amplification for amplitude stimuli close to the response threshold. At a fixed stimuli level the initial state  
238 of the cellular proteome determines the HSRN cellular activation response. This response may be mainly  
239 classified in three phenotypic clusters: (1) no activation, (2) transient activation, or (3) sustained activation.  
240 In a cell population all cells have a different proteome and thus all three types of activation dynamics are  
241 found for a given stress stimuli. We found that the probability of sustained activation increases with the  
242 stimuli level. Therefore, the averaged dynamical response measured by biochemical measurements (averages  
243 over a cell population) characterizes more the occurrence of the various phenotypes than the dynamics  
244 associated with a specific stress stimuli. Furthermore, although the sequestration cascades are heterogeneity  
245 amplifiers for chronic stress ( $T \geq 43^\circ\text{C}$ ) the same sequestration cascades induce heterogeneity collapse in  
246 the case of a mild stress. With this viewpoint hypersensitivity of the stimuli-to-response curve could be a  
247 strategy to quench the protein expression heterogeneity below a given stimuli threshold.

248 We show that variation of HSP72 and HSC70 molecular chaperones plays a major role in CCRV. This  
249 is expected within the framework of titration model for HSF1 as HSP70 family taht is shown to interact  
250 strongly with HSF1 transcription factor in unstressed cells Shi *et al*, 1998. This interaction was shown to  
251 be responsible for HSF1 sequestration in the absence of stress and desequstration from HSP70 that is to  
252 be crucial for HSRN activation in yeast Zheng *et al*, 2016. We have tested whether CCRV could also arise  
253 from level variations of HSP90, another important chaperone. While HSP90 exhibits weakly interaction with  
254 HSF1 without stress Zou *et al*, 1998, recent results suggest that sequestration may not be the important

255 role of HSP90 in HSF1 regulation Kijima *et al*, 2018. Instead HSP90 interacts with transcriptionally active  
256 HSF1 trimers Conde *et al*, 2009 and newly synthesized HSP90 may regulate HSF1 by attenuating its ability  
257 to promote transcription when bound to HSE in DNA Kijima *et al*, 2018. Interestingly, at the single cell  
258 level, we do not find correlation between HSRN activation and HSP90 copy number (data not shown). These  
259 results are consistent with the fact that our readout (nSBs) is a measurement of HSRN activation but does  
260 not reflect transcriptional activity *per se*.

261 Human HSP70 expression was shown to vary with the cell cycle stage Milarski and Morimoto, 1986.  
262 However, in our experimental conditions, we do not find a significant correlation between single cell DNA  
263 content (assessed by Hoechst fluorescence level) and HSP72 or HSC70 nuclear concentration. Instead HSP  
264 expression level distribution could be attributed to transcriptional bursts intrinsically amplified by mRNA  
265 processing that causes substantial noise amplification at proteins level (Hansen and O Shea, 2016). Within  
266 our mathematical framework, HSP72 and HSC70 copy number explain around 50% of CCRV. Recent ex-  
267 periments in yeast have revealed that HSF1 hyperphosphorylation is another source of variability in HSRN  
268 Zheng *et al*, 2018. Such post-translational modifications control HSF1 activity on HSE rather than its acti-  
269 vation in the cytosol Zheng *et al*, 2016. We note that HSF1 phosphorylation could play a role in the CCRV  
270 we observe as it might induce variations in HSP72 transcription rate upon stress. However, it has to be  
271 noted that in our study we focus on activation of HSF1. Newly produced HSP72 (one hour after the stress  
272 onset) is rather small compared to pre-stimulus HSP72 level (see Fig. 4) and the span of HSP72 expression  
273 level is comparable to the one of unstressed cells (Fig. SI 6). Moreover the effect of HSC70 (which is not  
274 stress induced) on CCRV confirms the existence of a variability source, distinct from HSF1 phosphorylation,  
275 where the pre-stimulus cellular state at least partially determines single cell stress response.

276 HSP72 and HSC70 play a similar role in the refolding of misfolded proteins. Expression levels of the two  
277 protein subspecies are not correlated. From the network point of view this redundancy is intriguing. We  
278 suggest that such a redundancy may help to quench CCRV over the cell population. To test this hypothesis  
279 we include in the mathematical model two HSP species having uncorrelated but similar expression levels.  
280 This result in a reduced response heterogeneity with a two fold lower standard deviation (Fig. SI 9 of the  
281 supplementary information). HSPs redundancy may therefore reflect a strategy to compensate the protein  
282 expression fluctuations.

283 Our results highlight that the sequestration cascade mechanisms leading to the titration of HSF1 by basal  
284 HSP and MFP can control with ultrasensitivity the stress response. It is a sufficient guideline of a regulation  
285 network that describes the cellular heat shock response at both the population and the single cell levels. In  
286 this latter case, the HSPs stochastic expression variability explains the observed phenotypic heterogeneity.  
287 Therefore the ability to control the HSPs expression distribution, and not only its averaged expression level,  
288 should imply the ability to control the phenotypic heterogeneity and then to potentially reduce a therapy  
289 resistant subset of cells. Hypersensitivity of HSNR is a feature shared by several stress induced biological  
290 networks. As the amplification of heterogeneity is due more to hypersensitivity of the response than to the

291 molecular mechanisms that engender it (sequestration in our case) the results and methods developed here  
292 could therefore be extended to other networks of stress and other hypersensitive networks.



## 293 MATERIALS AND METHODS

### 294 Cell culture and cell transfection

295 The HeLa human cervical cancer cell line (CCL-2<sup>TM</sup>) was purchased from the American Type Culture Col-  
296 lection (ATCC, Manassas, VA). These adherent cells are grown as monolayer in Dulbecco's modified Eagle's  
297 medium (DMEM ; Lonza, Levallois-Perret, France) supplemented with 10% (v/v) fetal bovine serum (FBS  
298 ; Life Technologies, Saint-Aubin, France), 1% L-glutamine (2 mM) and 1% (v/v) penicillin-streptomycin  
299 (100 IU/ml) (Lonza). Cell cultures are maintained at 37°C in a humidified atmosphere containing 5 %  
300 CO<sub>2</sub> (v/v), and passage at preconfluence (twice a week) using 0.05 % trypsin-0.53 mM ethylenediamine  
301 tetraacetate (EDTA ; Lonza). HeLa growing cells are routinely screened for the presence of mycoplasma  
302 using DNA-staining with the nuclear dye Hoechst 33342 (1:10000 dilution) (Sigma-Aldrich, L'Isle d'Abeau  
303 Chesnes, France) to avoid collecting data from unknowingly contaminated cell cultures.

304 Wild-type HeLa cells (HeLa-WT) were transfected with a plasmid expressing the human full-length  
305 HSF1 fused to eGFP. The plasmid was kindly provided by Dr. Claire Vourc'h (Université Joseph-Fourier,  
306 Grenoble, France) and built as previously described Herbomel *et al* (2013). Briefly, PCR amplification  
307 allowed to obtain the coding sequence for human HSF1 that was cloned into peGFP N3 vector (Clontech  
308 Laboratories Mountain View, CA); the plasmid was then verified by sequencing (GATC Biotech, Constance,  
309 Germany). The transfection (of wild-type HeLa cells with the HSF1:eGFP plasmid) was carried out using  
310 FuGENE<sub>LD</sub> HD transfection reagent (Promega, Charbonnières, France) according to the manufacturer's  
311 instructions. The stable HSF1:eGFP-transfected (HeLa-HSF1:eGFP) cell line was then established under  
312 selective pressure by 1000 µg/ml geneticin (Life Technologies) followed by selection of a single GFP-positive  
313 cell by flow cell sorting system (FACS Aria III, Becton Dickinson, San Jose, CA).

314 All experiments were performed on 2-day-old cell cultures (50 % confluence) prepared by seeding 1.8x10<sup>5</sup>  
315 cells into 35-mm dishes (Sarstedt, Marnay, France) in complete DMEM without phenol red.

### 316 Immunofluorescence staining of HSPs and HSF1

317 After 48 h of culture, HeLa-WT and HeLa-HSF1:GFP cells are heated at 43°C for one hour in our homemade  
318 incubator controlled in temperature and gas conditions Anquez *et al*, 2012. At the end of the thermal stress,  
319 and in parallel to the unstressed samples (control, 37°C ), cells are immediately rinsed with Dulbecco's  
320 Phosphate-Buffered Saline (DPBS ; Lonza), and fixed in 4% paraformaldehyde in DPBS for 10-15 minutes  
321 at room temperature (RT). After washing three-times with DPBS, samples are incubated for 30 minutes at  
322 RT in DPBS containing 0.3% Triton X100 and 5% goat serum (v/v) allowing permeabilization of cells and  
323 blocking of non-specific binding sites. Cells are then incubated overnight at 4°C with monoclonal primary  
324 antibody as following : mouse anti-Hsc70 (1:100 dilution ; Santa Cruz Biotechnology, Dallas, Texas, USA), or  
325 mouse anti-HSP72 (1:100 dilution ; Enzo Life Sciences, Villeurbanne, France), or rabbit anti-HSF1 antibody  
326 (Enzo Life Sciences). Subsequently, samples are washed, and incubated for 90 min at RT with either a goat

327 anti-mouse (for Hsc70/HSP72 expression) or a goat anti-rabbit (for HSF1 expression) secondary antibody  
328 conjugated to Alexa Fluor-594 (Life Technologies). A DNA-staining using Hoechst 33342 (1:10000) is also  
329 performed for all samples, to allow the automatic detection of nuclear areas for image analysis.

### 330 **Live/Fixed cells imaging**

331 HeLa cells are cultured in 35 mm dishes (starsedt) at approximately 50% confluence. Samples are placed  
332 on a Nikon TiE microscope with motorized filters wheel equipped with a XY-motorized stage (ASI). Cells  
333 were imaged through a 40X microscope objective (NA=0.6, Nikon) on a sCMOS camera (OrcaFlash LT,  
334 Hamamatsu). We set the camera binning to 2 resulting in an effective pixel size of 325 nm. Illumination  
335 for fluorescence and brightfield imaging is achieved through custom built optical system (components from  
336 Thorlabs). We use LED light source (Thorlabs) for synchronization of illumination with other apparatus.  
337 Exposure time is set to 150 ms for all experiments and for each fluorescence channel as well as brightfield  
338 illumination. Light power density, filter set and LED for each type of experiments are summarized in Tab. SI  
339 1 of the supporting information. We use a custom-built acquisition software written in Labview to control  
340 the setup.

341 For live cells experiments culture dishes are maintained in a custom-built incubator which regulate  
342 temperature, humidity and atmosphere. The incubator was described in Anquez *et al*, 2012. Cells are  
343 maintained at 37°C for one hour and heat shocked at 41, 42 or 43°C for three hours by increasing the  
344 incubator temperature. Time evolution of the Nuclear Stress Bodies foci is monitored in real time. In order  
345 to increase the output rate of the experiment we acquire data for ten different fields of view in the same  
346 dish (by use of the motorized stage) leading to the tracking of approximately 200 cells per experiment. Two  
347 consecutive fields of view are separated by approximately 300 $\mu$ m. To account for focusing drift and to allow  
348 image segmentation we acquired for each field of view a z-stack of nine images per channel by moving the  
349 objective lens along the optical axis. Two consecutive images of the stack are defocused by approximately 2  
350  $\mu$ m. We acquired z-stack at a 0.5 image/min rate.

351 For fixed cells imaging heat shock are performed in the same incubator as the live cell data. Cells  
352 are shocked for one hour at 43°C and then fixed right after. After fixation and immunolabeling (proto-  
353 cols described below) cells are imaged on the same microscope. For these experiments we used the Nikon  
354 Perfect Focus system and thus did not acquire z-stack. We image 400 positions per condition leading to  
355 approximately 8000 cells per experiment.

### 356 **Image processing and analysis**

357 All image processing and data analysis was performed using custom written algorithms either in Fortran or  
358 in Matlab.

359 For time lapse microscopy experiments we first estimate best focus for each z-stack by use of a contrast  
360 function Price and Gough, 1994. Best focus was estimated from fluorescence images. We did not found

361 significant defocusing between fluorescence and brightfield in our experimental conditions. Cells were au-  
362 tomatically segmented using brightfield image z-stack. For this we take advantage of the fact that gray  
363 level varies across the z-stack for pixels located in cells while such gray level is approximately constant for  
364 background pixels and pixels at the periphery of the cells. Image segmentation was visually inspected after  
365 image processing. Corrections to cell segmentation were carried when necessary *via* a custom written semi-  
366 automated graphical interface by either removing false positive or correcting masks. After cell segmentation  
367 cells were tracked by simply linking the closest cell found in the next image. Visual inspection of the tracking  
368 did not reveal errors as the cells do not move significantly in the time interval between two acquisition. We  
369 then estimate background for fluorescence images by convolving the raw data with a 30 pixels wide gaussian  
370 kernel (larger than cell size) and averaging across the z-stack. Background was subtracted to raw data for  
371 further analysis. Total HSF1-GFP intensity was simply estimated by integrating fluorescence intensity over  
372 the whole cell mask. HSF1-GFP foci were automatically detected by use of wavelets transform with wavelet  
373 radius of 2 pixels Olivo-Marin, 2002. Only spots with maximum intensity higher than mean cell intensity  
374 was considered for further analysis. The  $F$  factor was defined as the integrated intensity found in all foci  
375 divided by the total cellular fluorescence.

376 For fixed cells immunofluorescence experiments image segmentation was achieved on images from HSP  
377 fluorescence channel for whole cell segmentation and on the images from Hoechst fluorescence channel for  
378 the nucleus segmentation. We acquired fluorescence images of dishes filled with fluorescent dye for flat  
379 field correction. The dyes were coumarin for Hoechst channel, rhodamine 110 for GFP and AlexaFluor488  
380 channel and rhodamine B for AlexaFluor594 channel. After flat field correction images were segmented  
381 using a modified Otsu thresholding method Otsu, 1979. A constant background was subtracted before  
382 further analysis.  $F$  was defined as above and HSP concentration was defined as the total fluorescence inside  
383 nucleus divided by the nuclear area in arbitrary units. False positive detection were removed by selecting a  
384 polygon in the Hoechst intensity versus nucleus area plane.

## 385 **Mathematical model for HSRN**

386 The heat stress cellular response dynamic is mainly regulated by two complexes that both involve the  
387 chaperone proteins HSP (Sivéry *et al*, 2016). HSPs titrate the misfolded proteins, on the one hand, and  
388 its own transcription factor (HSF1) on the other. A reduced model of the cellular response to heat stress is  
389 constructed from a detailed kinetic one of the literature (Sivéry *et al*, 2016) under the following assumptions:  
390 (i) all protein species have similar half-life; (ii) the assembly dynamics and assemblies of the protein complexes  
391 are adiabatically eliminated and equilibrium equations at the fixed points are approximated by rational  
392 functions (See Sec. SI 11 of the Supporting Information for details).

393 In addition to the model developed in Sivéry *et al*, 2016, the present model improves the regulation  
394 of the translation process via HSPs. In fact, Heat shock proteins are requested to initiate the translation  
395 process, therefore the sequestration of Heat shock Protein by Misfolded Protein reduces the ability of HSP

396 to initiate the translation. Straightforwardly, we include in the modeling an HSP dependent translation rate  
 397 which decreases as free monomeric HSP form vanishes. This mechanistic detail is crucial to describe the  
 398 slow increase of foci dynamics during a 43°C heat stress.

399 The model equations reads :

$$\tau_{\theta} \frac{d}{dt} \theta = \theta_c - \theta \quad (1)$$

$$\tau_{\text{MFP}} \frac{d}{dt} [\text{MFP}] = \kappa(\theta) - \frac{[\text{MFP}]^2}{[\text{HSP}] + [\text{MFP}]} \quad (2)$$

$$-k_r \frac{[\text{MFP}] [\text{HSP}]}{[\text{HSP}] + [\text{MFP}]} \quad (3)$$

$$\tau_{\text{mHSP}} \frac{d}{dt} [\text{mHSP}] = \mu + \lambda \frac{S^3}{S_0^3 + S^3} - [\text{mHSP}] \quad (4)$$

$$\tau_{\text{HSP}} \frac{d}{dt} [\text{HSP}] = \beta \frac{[\text{HSP}]}{H_0 + [\text{HSP}]} [\text{mHSP}] - [\text{HSP}] \quad (5)$$

$$f = \frac{[\text{HSF1}]}{[\text{HSF1}] + [\text{HSP}] \frac{[\text{HSP}]}{[\text{HSP}] + [\text{MFP}]} } \quad (6)$$

400 where  $t$  is time;  $\theta$  is the temperature of the cell environment measured in °C; [MFP], the misfolded protein  
 401 concentration; [mHSP], the concentration of mRNA coding for HSP ; [HSP], the heat shock protein concen-  
 402 tration; [HSF1] the heat shock factor 1 protein concentration; and  $f$ , the concentration of free HSF1 proteins  
 403 (not bounded to HSP).

404 The denaturation rate  $\kappa(\theta)$  is here the only temperature input. Mathematical expression of  $\kappa(\theta)$  was  
 405 discussed in Peper *et al*, 1998 and takes the following form in the range 37°C–45°C :

$$\kappa_d(\theta) = D (1 - 0.4e^{37-\theta}) 1.4^{\theta-37} \quad (7)$$

406 Note that  $\tau_{\theta}$ , the incubator rise time, was measured experimentally. Also all rate constant are normalized  
 407 (see Supporting information for details). The signification and values of model parameters are summarized  
 408 in Tab. SI 2 of the Supplementary Information.

409 In this framework, the fraction of HSF1 bound to NSBs at a given date  $t$  is proportional to:

$$F_{Th}(t) = \left( \frac{1}{1 + \frac{[\text{HSP}](t)}{[\text{HSF1}](t)} \frac{1}{1 + \frac{[\text{MFP}](t)}{[\text{HSP}](t)}}} \right)^3 \quad (8)$$

410 where [HSF1]( $t$ ), [HSP]( $t$ ), and [MFP]( $t$ ) refer to the HSF1, HSP, and MFP concentrations at the date  $t$   
 411 (Fig. 3-A). Note that the power 3 in expression Eq. 8 arises from the fact that only trimmers of HSF1 are  
 412 bound.

413 This expression for  $F_{Th}$  given in Eq. 8 depends on two concentration ratios,  $\frac{[\text{MFP}]}{[\text{HSP}]}$  and  $\frac{[\text{HSP}]}{[\text{HSF1}]}$  that  
 414 reflect the two competitive complex formations: The first ratio reflects the MFP titration by HSPs while the

415 second ratio accounts for HSF1 titration by HSPs.

416 In practice we seek to compare measurements from fluorescence microscopy with expression 8. Con-  
417 centration of HSF1 and HSP are measured in fluorescence (arbitrary) units while MFP concentration is  
418 unknown. We introduce a scale parameter  $\alpha$  that both account for conversion from fluorescence units to  
419 concentration units and the unknown concentration of MFP relative to HSP. It is important to note that  $\alpha$   
420 can vary from one cell to another only because MFP concentration is unknown. For convenience we introduce  
421  $r(t) = \frac{[HSP](t)}{[HSF1](t)}$  where  $[HSP](t)$  and  $[HSF1](t)$  are measured in fluorescence units.  $F_{Th}(t)$  then reads :

$$F_{th}(t) = \left( \frac{1}{1 + \alpha \times r(t)} \right)^3 \quad (9)$$

## 422 Acknowledgements

423 This work has been partially supported by the LABEX CEMPI (ANR-11-LABX-0007), as well as by the  
424 Ministry of Higher Education and Research, Hauts de France council and European Regional Development  
425 Fund (ERDF) through the Contrat de Projets Etat-Region (CPER Photonics for Society P4S).

## 426 Author Contributions

427 Performed research M.G. F.A. A.P. Q.T.; Designed research M.G. F.A. E.C. Q.T.; Analyzed data; M.G.  
428 F.A. Q.T.; Wrote the paper F.A. E.C. Q.T.

## 429 References

- 430 Abravaya K, Myers M, Murphy S, Morimoto R (1992) The human heat shock protein hsp70 interacts with  
431 HSF, the transcription factor that regulates heat shock gene expression. *Genes development* **6**: 1153–1164
- 432 Acar M, Mettetal JT, Van Oudenaarden A (2008) Stochastic switching as a survival strategy in fluctuating  
433 environments. *Nature genetics* **40**: 471
- 434 Albeck JG, Burke JM, Aldridge BB, Zhang M, Lauffenburger DA, Sorger PK (2008) Quantitative analysis  
435 of pathways controlling extrinsic apoptosis in single cells. *Molecular cell* **30**: 11–25
- 436 Almendro V, Marusyk A, Polyak K (2013) Cellular heterogeneity and molecular evolution in cancer. *Annual*  
437 *Review of Pathology Mechanisms of Disease* **8**: 277–302
- 438 Altschuler SJ, Wu LF (2010) Cellular heterogeneity: do differences make a difference? *Cell* **141**: 559–563
- 439 Anquez F, El Yazidi-Belkoura I, Randoux S, Suret P, Courtade E (2012) Cancerous cell death from sensitizer  
440 free photoactivation of singlet oxygen. *Photochemistry and photobiology* **88**: 167–174

- 441 Baler R, Dahl G, Voellmy R (1993) Activation of human heat shock genes is accompanied by oligomerization,  
442 modification, and rapid translocation of heat shock transcription factor HSF1. *Molecular and cellular*  
443 *biology* **13**: 2486–2496
- 444 Behar M, Barken D, Werner SL, Hoffmann A (2013) The dynamics of signaling as a pharmacological target.  
445 *Cell* **155**: 448–461
- 446 Bertaux F, Stoma S, Drasdo D, Batt G (2014) Modeling dynamics of cell-to-cell variability in TRAIL-induced  
447 apoptosis explains fractional killing and predicts reversible resistance. *PLoS computational biology* **10**:  
448 e1003893
- 449 Biamonti G, Vourc'h C (2010) Nuclear stress bodies. *Cold Spring Harbor perspectives in biology* : a000695
- 450 Boulon S, Westman B, Hutten S, Boisvert F, Lamond A (2010) The nucleolus under stress. *Molecular cell*  
451 **40**: 216–227
- 452 Buchler NE, Cross FR (2009) Protein sequestration generates a flexible ultrasensitive response in a genetic  
453 network. *Molecular systems biology* **5**: 272
- 454 Cohen AA, Geva-Zatorsky N, Eden E, Frenkel-Morgenstern M, Issaeva I, Sigal A, Milo R, Cohen-Saidon C,  
455 Liron Y, Kam Z, *et al* (2008) Dynamic proteomics of individual cancer cells in response to a drug. *science*  
456 **322**: 1511–1516
- 457 Conde R, Belak ZR, Nair M, O'Carroll RF, Ovsenek N (2009) Modulation of Hsf1 activity by novobiocin  
458 and geldanamycin. *Biochemistry and Cell Biology* **87**: 845–851
- 459 Cotto J, Fox S, Morimoto R (1997) HSF1 granules: a novel stress-induced nuclear compartment of human  
460 cells. *Journal of cell science* **110**: 2925–2934
- 461 Cotto J, Kline M, Morimoto R (1996) Activation of heat shock factor 1 DNA binding precedes stress-induced  
462 serine phosphorylation. *Journal of Biological Chemistry* **271**: 3355–3358
- 463 Feinerman O, Veiga J, Dorfman JR, Germain RN, Altan-Bonnet G (2008) Variability and robustness in T  
464 cell activation from regulated heterogeneity in protein levels. *Science* **321**: 1081–1084
- 465 Flusberg DA, Sorger PK (2015) Surviving apoptosis: life–death signaling in single cells. *Trends in cell biology*  
466 **25**: 446–458
- 467 Gascoigne KE, Taylor SS (2008) Cancer cells display profound intra-and interline variation following pro-  
468 longed exposure to antimetabolic drugs. *Cancer cell* **14**: 111–122
- 469 Gething MJ, Sambrook J (1992) Protein folding in the cell. *Nature* **355**: 33
- 470 Geva-Zatorsky N, Rosenfeld N, Itzkovitz S, Milo R, Sigal A, Dekel E, Yarnitzky T, Liron Y, Polak P, Lahav  
471 G, *et al* (2006) Oscillations and variability in the p53 system. *Molecular systems biology* **2**

- 472 Goldbeter A, Koshland D (1984) Ultrasensitivity in biochemical systems controlled by covalent modification.  
473 Interplay between zero-order and multistep effects. *Journal of Biological Chemistry* **259**: 14441–14447
- 474 Hansen AS, O Shea EK (2016) Encoding four gene expression programs in the activation dynamics of a  
475 single transcription factor. *Current Biology* **26**: R269–R271
- 476 Herbomel G, Kloster-Landsberg M, Folco EG, Col E, Usson Y, Vourc'h C, Delon A, Souchier C (2013)  
477 Dynamics of the full length and mutated heat shock factor 1 in human cells. *PLoS one* **8**: e67566
- 478 Holmberg C, Tran S, Eriksson J, Sistonen L (2002) Multisite phosphorylation provides sophisticated regu-  
479 lation of transcription factors. *Trends in biochemical sciences* **27**: 619–627
- 480 Huang S (2009) Non-genetic heterogeneity of cells in development: more than just noise. *Development* **136**:  
481 3853–3862
- 482 Irish JM, Hovland R, Krutzik PO, Perez OD, Bruserud Ø, Gjertsen BT, Nolan GP (2004) Single cell profiling  
483 of potentiated phospho-protein networks in cancer cells. *Cell* **118**: 217–228
- 484 Jolly C, Morimoto RI (2000) Role of the heat shock response and molecular chaperones in oncogenesis and  
485 cell death. *Journal of the National Cancer Institute* **92**: 1564–1572
- 486 Kærn M, Elston TC, Blake WJ, Collins JJ (2005) Stochasticity in gene expression: from theories to pheno-  
487 types. *Nature Reviews Genetics* **6**: 451
- 488 Kijima T, Prince TL, Tigue ML, Yim KH, Schwartz H, Beebe K, Lee S, Budzynski MA, Williams H, Trepel  
489 JB, *et al* (2018) HSP90 inhibitors disrupt a transient HSP90-HSF1 interaction and identify a noncanonical  
490 model of HSP90-mediated HSF1 regulation. *Scientific reports* **8**: 6976
- 491 Kline M, Morimoto R (1997) Repression of the heat shock factor 1 transcriptional activation domain is  
492 modulated by constitutive phosphorylation. *Molecular and cellular biology* **17**: 2107–2115
- 493 LeBlanc H, Lawrence D, Varfolomeev E, Totpal K, Morlan J, Schow P, Fong S, Schwall R, Sinicropi D, Ashke-  
494 nazi A (2002) Tumor-cell resistance to death receptor-induced apoptosis through mutational inactivation  
495 of the proapoptotic Bcl-2 homolog Bax. *Nature medicine* **8**: 274
- 496 Loewer A, Lahav G (2011) We are all individuals: causes and consequences of non-genetic heterogeneity in  
497 mammalian cells. *Current opinion in genetics development* **21**: 753–758
- 498 Mercier PA, Winegarden NA, Westwood JT (1999) Human heat shock factor 1 is predominantly a nuclear  
499 protein before and after heat stress. *Journal of cell science* **112**: 2765–2774
- 500 Milarski KL, Morimoto RI (1986) Expression of human HSP70 during the synthetic phase of the cell cycle.  
501 *Proceedings of the National Academy of Sciences* **83**: 9517–9521



- 502 Morimoto RI (2012) The heat shock response: systems biology of proteotoxic stress in aging and disease. In  
503 *Cold Spring Harbor symposia on quantitative biology*. Cold Spring Harbor Laboratory Press
- 504 Mosser D, Theodorakis N, Morimoto R (1988) Coordinate changes in heat shock element-binding activity  
505 and HSP70 gene transcription rates in human cells. *Molecular and cellular biology* **8**: 4736–4744
- 506 Neumüller RA, Knoblich JA (2009) Dividing cellular asymmetry: asymmetric cell division and its implica-  
507 tions for stem cells and cancer. *Genes development* **23**: 2675–2699
- 508 Niepel M, Spencer SL, Sorger PK (2009) Non-genetic cell-to-cell variability and the consequences for phar-  
509 macology. *Current opinion in chemical biology* **13**: 556–561
- 510 Olivo-Marin JC (2002) Extraction of spots in biological images using multiscale products. *Pattern recognition*  
511 **35**: 1989–1996
- 512 Orth JD, Tang Y, Shi J, Loy CT, Amendt C, Wilm C, Zenke FT, Mitchison TJ (2008) Quantitative live  
513 imaging of cancer and normal cells treated with Kinesin-5 inhibitors indicates significant differences in  
514 phenotypic responses and cell fate. *Molecular cancer therapeutics* **7**: 3480–3489
- 515 Otsu N (1979) A threshold selection method from gray-level histograms. *IEEE transactions on systems man*  
516 *and cybernetics* **9**: 62–66
- 517 Peper A, Grimbergen C, Spaan J, Souren J, Wijk R (1998) A mathematical model of the hsp70 regulation  
518 in the cell. *International journal of hyperthermia* **14**: 97–124
- 519 Pfeuty B, Thommen Q (2016) Adaptive Benefits of Storage Strategy and Dual AMPK/TOR Signaling in  
520 Metabolic Stress Response. *PloS one* **11**: e0160247
- 521 Price JH, Gough DA (1994) Comparison of phase-contrast and fluorescence digital autofocus for scanning  
522 microscopy. *Cytometry The Journal of the International Society for Analytical Cytology* **16**: 283–297
- 523 Reyes J, Lahav G (2018) Leveraging and coping with uncertainty in the response of individual cells to  
524 therapy. *Current opinion in biotechnology* **51**: 109–115
- 525 Roux J, Hafner M, Bandara S, Sims JJ, Hudson H, Chai D, Sorger PK (2015) Fractional killing arises from  
526 cell-to-cell variability in overcoming a caspase activity threshold. *Molecular systems biology* **11**: 803
- 527 Sarge KD, Murphy SP, Morimoto RI (1993) Activation of heat shock gene transcription by heat shock factor  
528 1 involves oligomerization, acquisition of DNA-binding activity, and nuclear localization and can occur in  
529 the absence of stress. *Molecular and cellular biology* **13**: 1392–1407
- 530 Shi Y, Mosser D, Morimoto RI (1998) Molecular chaperones as HSF1-specific transcriptional repressors.  
531 *Genes development* **12**: 654–666



- 532 Sigal A, Milo R, Cohen A, Geva-Zatorsky N, Klein Y, Liron Y, Rosenfeld N, Danon T, Perzov N, Alon U  
533 (2006) Variability and memory of protein levels in human cells. *Nature* **444**: 643
- 534 Sivéry A, Courtade E, Thommen Q (2016) A minimal titration model of the mammalian dynamical heat  
535 shock response. *Physical biology* **13**: 066008
- 536 Spencer SL, Gaudet S, Albeck JG, Burke JM, Sorger PK (2009) Non-genetic origins of cell-to-cell variability  
537 in TRAIL-induced apoptosis. *Nature* **459**: 428
- 538 Tavaria M, Gabriele T, Kola I, Anderson RL (1996) A hitchhiker's guide to the human Hsp70 family. *Cell*  
539 *stress chaperones* **1**: 23
- 540 Whitley D, Goldberg SP, Jordan WD (1999) Heat shock proteins: a review of the molecular chaperones.  
541 *Journal of Vascular Surgery* **29**: 748–751
- 542 Zheng X, Beyzavi A, Krakowiak J, Patel N, Khalil AS, Pincus D (2018) Hsf1 phosphorylation generates  
543 cell-to-cell variation in Hsp90 levels and promotes phenotypic plasticity. *Cell reports* **22**: 3099–3106
- 544 Zheng X, Krakowiak J, Patel N, Beyzavi A, Ezike J, Khalil AS, Pincus D (2016) Dynamic control of Hsf1  
545 during heat shock by a chaperone switch and phosphorylation. *Elife* **5**: e18638
- 546 Zou J, Guo Y, Guettouche T, Smith DF, Voellmy R (1998) Repression of heat shock transcription factor  
547 HSF1 activation by HSP90 (HSP90 complex) that forms a stress-sensitive complex with HSF1. *Cell* **94**:  
548 471–480

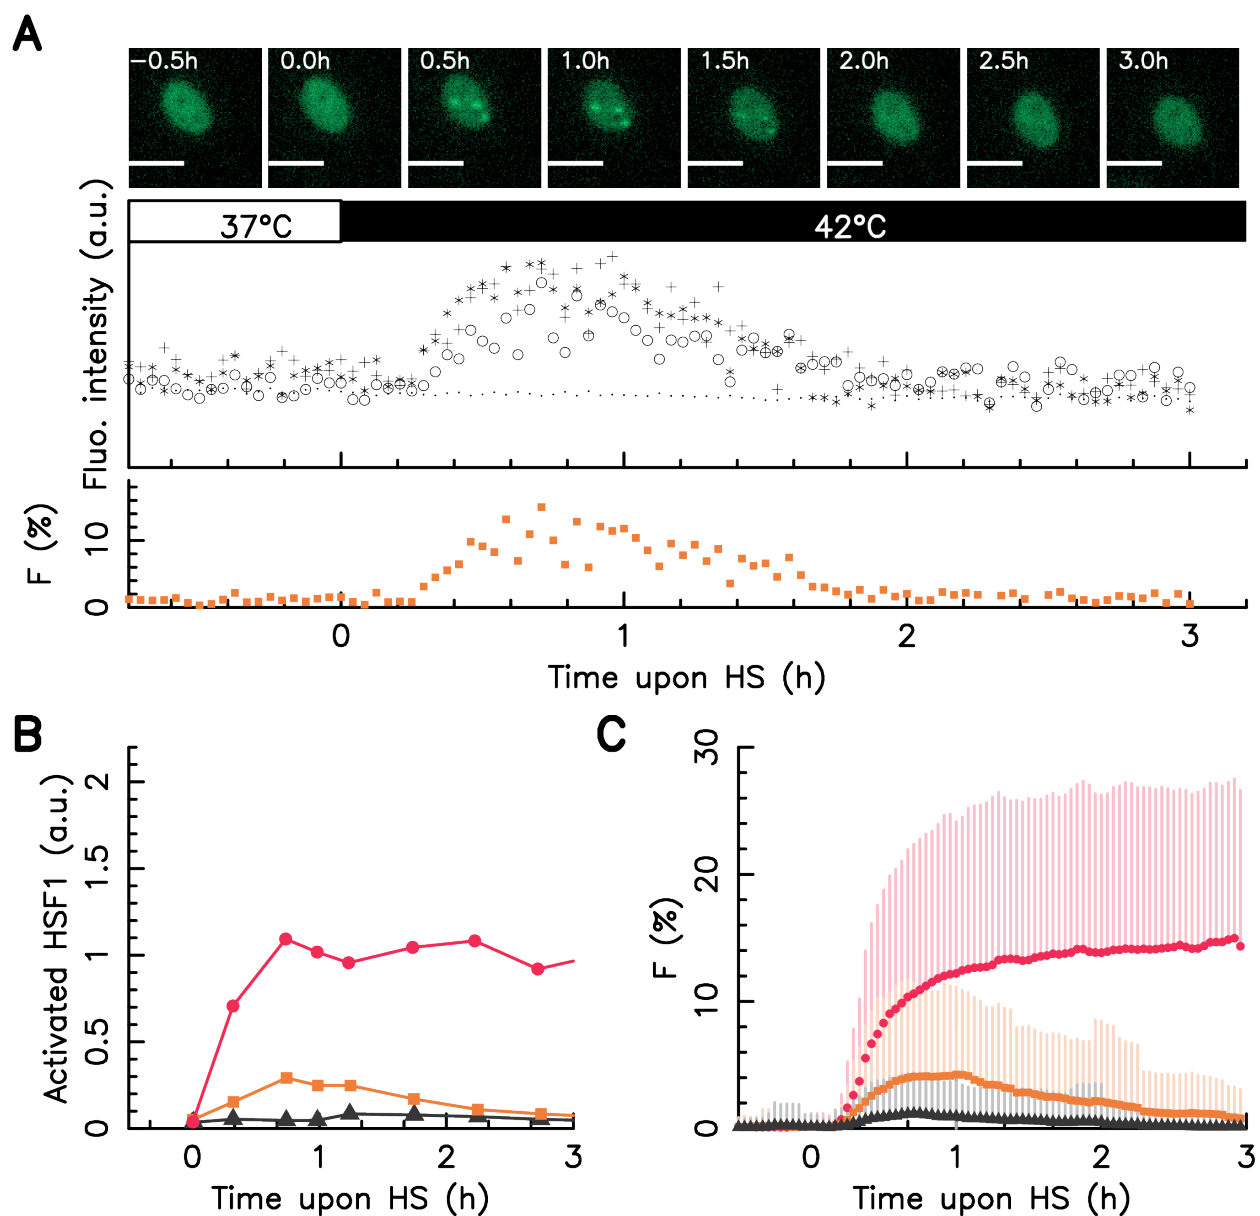

Figure 1: **Screening of foci dynamics in individual HeLa cells.** A – upper panel: snapshots of single HeLa HSF1:eGFP cell over time upon a 42°C heat stress, in the images, the white scale bars correspond to 10  $\mu\text{m}$ ; middle panel: dynamics of the fluorescence intensity measured in the center of the three visible foci (crosses, circles and stars) and average fluorescence level over the entire cell nucleus (dots); bottom panel: dynamics of the fraction of HSF1:eGFP fluorescence within foci  $F$ . B – Dynamics of activated HSF1 as measured by Abravaya *et al*, 1992 upon a 41°C (black) 42°C (orange), and 43°C (red) heat stress by run on assay C – Dynamics of the fraction of HSF1:eGFP fluorescence ( $F$ ) in nSBs monitored over time average over the whole cell populations upon a 41°C (black) 42°C (orange), and 43°C (red) heat stress for a large cell colony, dots stand for average values with on side error bars (standard deviation). In all cases, time zero coincides with the stress onset.

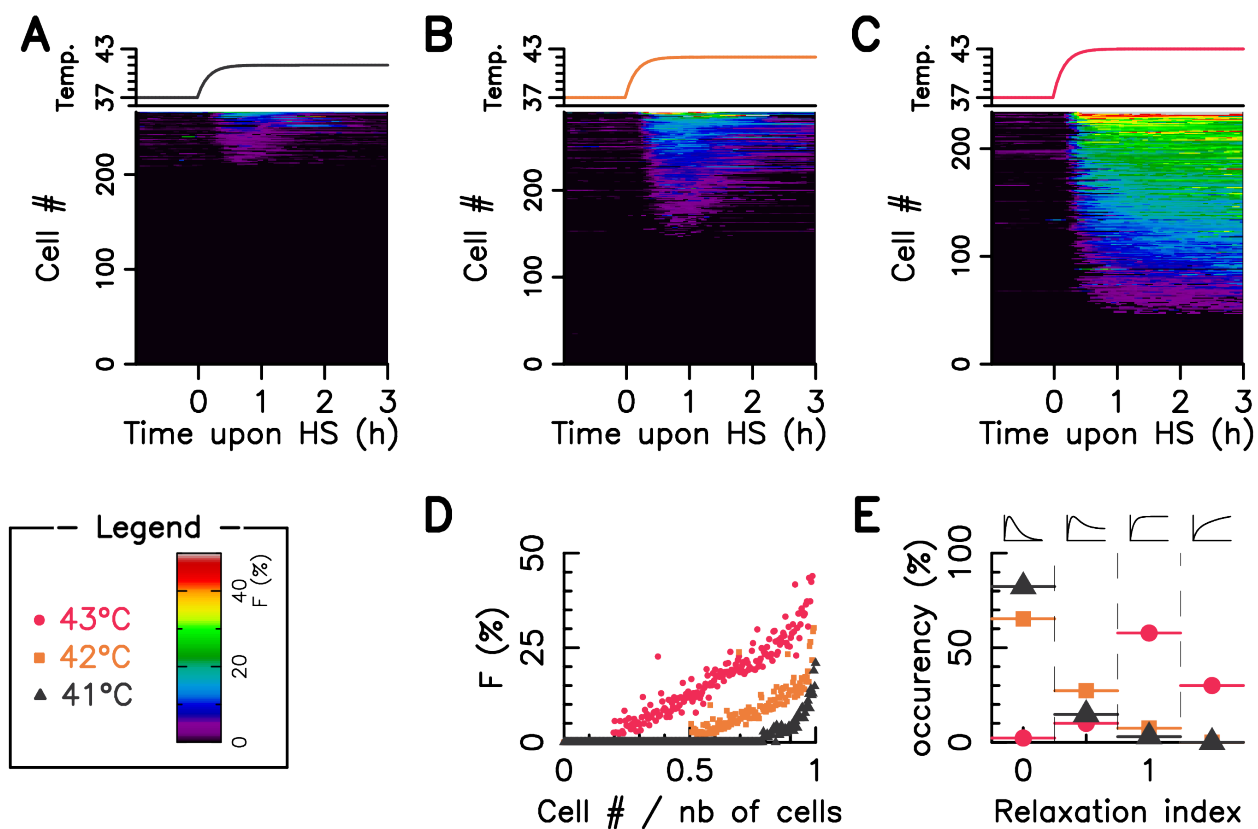

Figure 2: **Cell-to-cell variability in heat shock response** The fraction of HSF1:eGFP fluorescence in nSBs ( $F$ ) is monitored over time in single cell upon a 41°C 42°C and 43°C heat stress, time zero coincides with the stress onset. A-C Cell temperature time profile (upper panel) and  $F$  as a function of time in a single cell (lower panel) ; in the color image, each horizontal line corresponds to a single cell, a color code indicates the  $F$  value measured at a given time. D – Distribution of  $F$  across the cell population for several heat shock temperatures one hour after the stress onset (cell ranking is similar to D-F). E – Statistical distribution of the relaxation index defined as the ratio of the foci intensity measured in a given cell at three hours after the stress onset to the one measured one hour after the stress onset. The legend box defines the used color code.

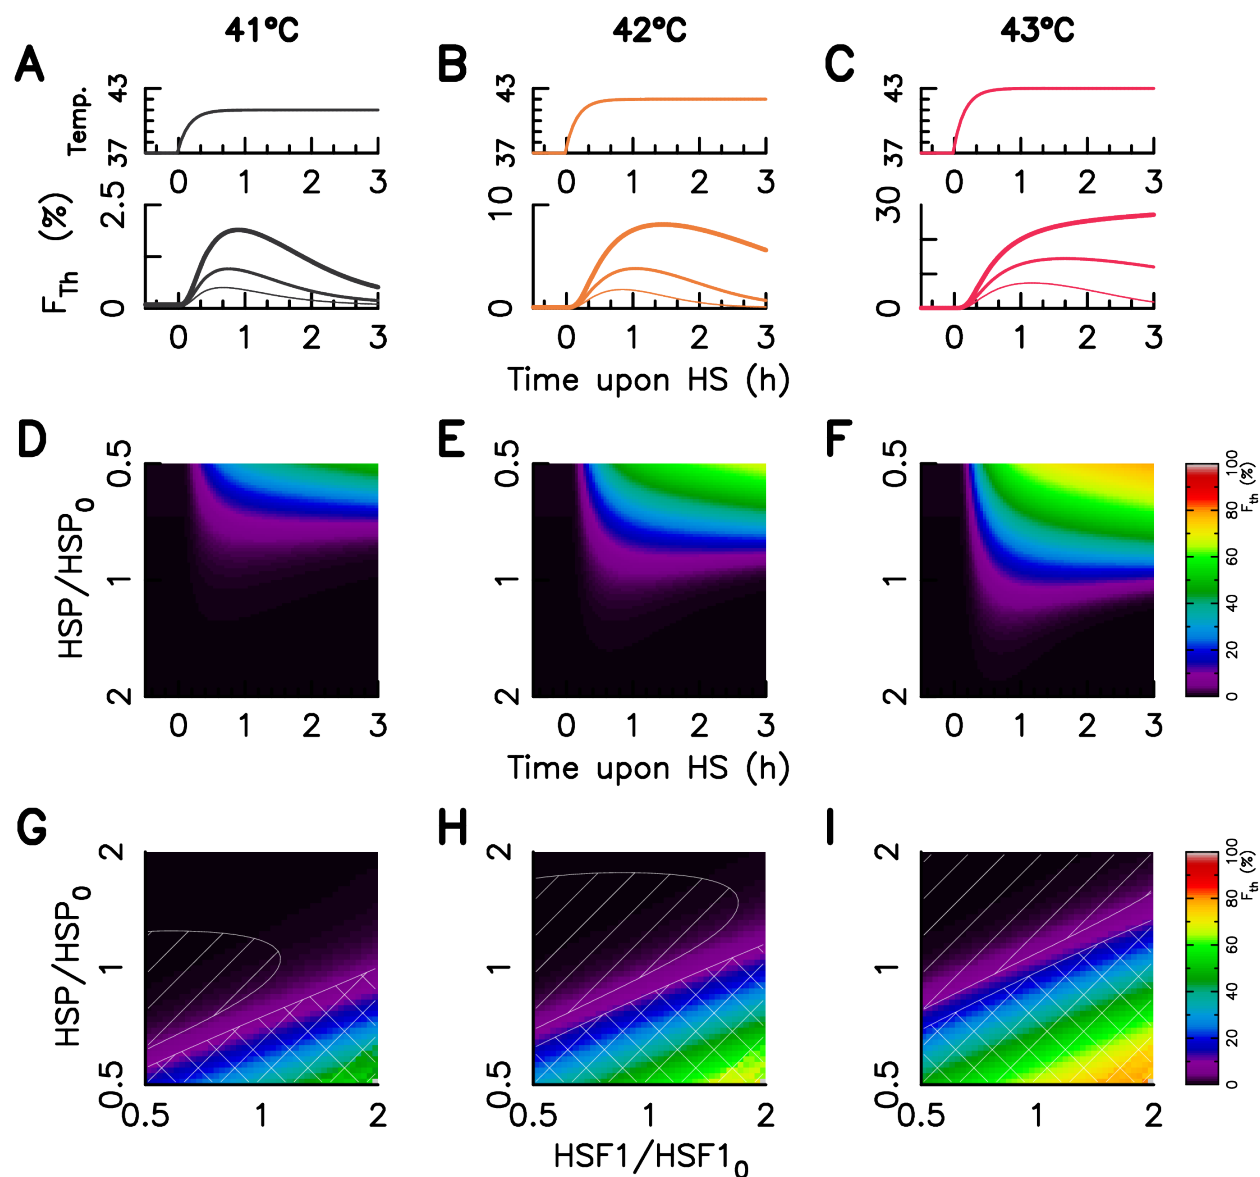

Figure 3: **Mathematical Modeling of heat shock response variability.** A–C – Temperature time profile (upper panel) and three examples of predicted foci dynamics for a given HSF1 and three various HSP level of expression, the thicker the line, the more the HSP level of expression (lower panel); D–F – Foci dynamics dependency on the HSP level of expression in the case of a 41°C (D), 42°C (E), and 43°C (F) heat stress. G–I – Foci intensity one hour after the stress onset for varying HSP and HSF1 copy number. HSP and HSF1 levels are expressed in fold change of the concentration for the model fitted on the population averaged data sets (HSF1<sub>0</sub> and HSP<sub>0</sub>). The relaxation index value is below 0.5 in the linear hatched area and above 1 in the crosshatched area. The stress intensity is indicated on the top of all columns. The used color code is similar to Fig 1 and is indicated in the legend box.

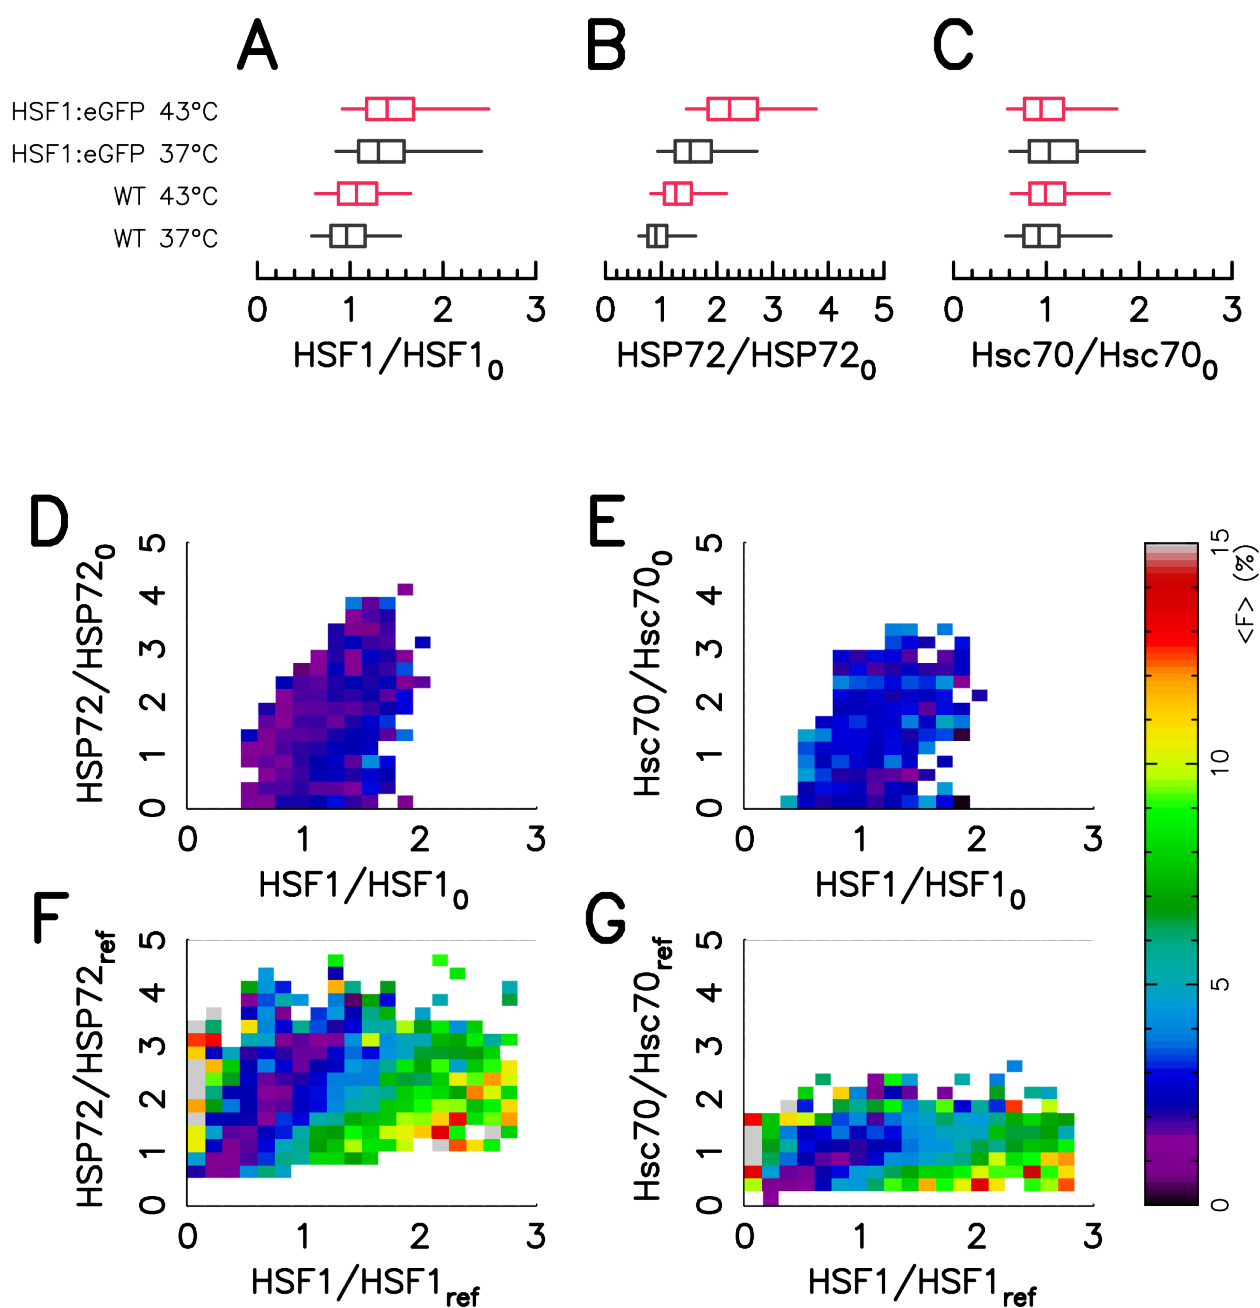

Figure 4: **Foci intensity vary with protein concentration** A-C – Protein expression distribution measured by Immuno-Fluorescence in HeLa Wild Type and HeLa-HSF1:eGFP cell lines for two thermal condition : at a 37°C temperature (black), at a 43°C temperature for one hour (red). The box represent quartile and the whiskers represent the the 6th percentile and the 95st percentile. The distributions are displayed in Fig. SI 6 of the supporting information. D-E – Average value of foci intensity in HeLa Wild Type cell line for a given HSF1 and HSP72 level of expression (D) and for a given HSF1 and Hsc70 level of expression (E). F-G – Average value of foci intensity in HeLa-HSF1:eGFP cell line for a given HSF1 and HSP72 level of expression (F) and for a given HSF1 and Hsc70 level of expression (G).

1 Protein level variability determines phenotypic heterogeneity in  
2 proteotoxic stress response.

3 Supplementary Information

4 Marie Guilbert, François Anquez, Alexandra Pruvost, Quentin Thommen\*, Emmanuel Courtade

5 May 22, 2019

6 Univ. Lille, CNRS, UMR 8523 – PhLAM – Physique des Lasers Atomes et Molécules, F-59000 Lille,  
7 France

8 \* Corresponding Author: Quentin Thommen, E-mail: [quentin.thommen@univ-lille.fr](mailto:quentin.thommen@univ-lille.fr)

9 Subject categories: Cell Cycle, Bioinformatics, Proteins

10 Keywords: Phenotypic heterogeneity / Cell-to-cell variability / Heat shock response / nuclear stress bodies  
11 / systems biology

12 Running Title: EMBO/MSB latex template

13 character count (including spaces): ?

## 14 SI 1 Imaging conditions

Table SI 1: Imaging conditions

| Fluorophore   | Light source | Excitation filter | Dichroic mirror | Emission filter | Light intensity |
|---------------|--------------|-------------------|-----------------|-----------------|-----------------|
| -             | LED          | (Semrock)         | (Semrock)       | (Semrock)       | ( $W.cm^{-2}$ ) |
| -             | (Thorlabs)   | (Semrock)         | (Semrock)       | (Semrock)       |                 |
| GFP           | M490L4       | FF02-482/18       | FF495-Di03      | FF02-520/28     | $\sim 1.8$      |
| AlexaFluor488 | M490L4       | FF02-482/18       | FF495-Di03      | FF02-520/28     | $\sim 1.8$      |
| AlexaFluor594 | MCWHL5       | FF01-536/20       | Di02-561        | FF01-600/37     | $\sim 1.35$     |
| Hoechst       | M365LP       | FF01-360/2        | FF416-Di01      | FF02-460/80     | $\sim 0.63$     |
| Brightfield   | MCWHL3       | -                 | FF495-Di03      | FF02-520/28     | $\sim 2.25$     |

## 15 SI 2 Foci intensity dynamic in wild-type cell line

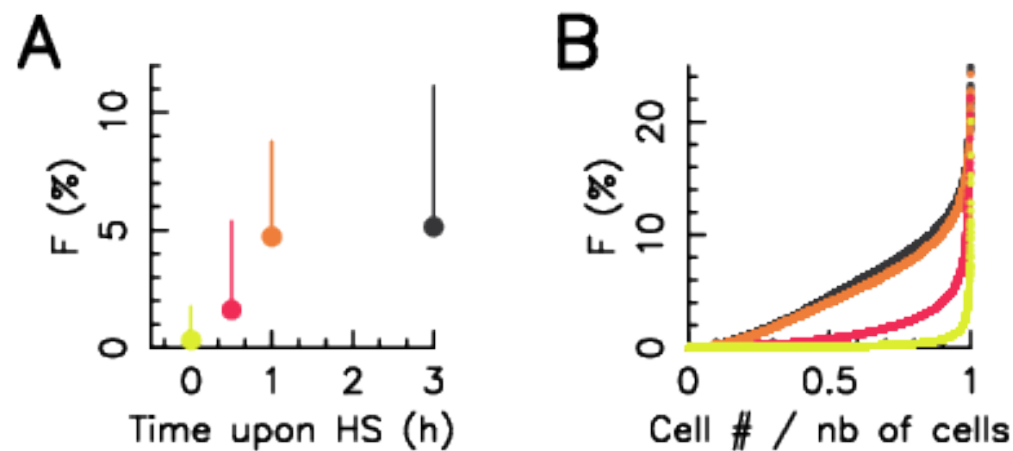

Figure SI 1: **Foci intensity dynamic in wild-type cell line during a 43°C Heat stress** A – Averaged value over the cell population of foci intensity measured on single-cell (dots) and associate error bar. B – Foci intensity in single cell ordered by increasing value. In both pictures the color code is the following: yellow - 37°C ; red - half an hour after the onset of a 43°C ; orange - one hour after the onset of a 43°C ; black – three hour after the onset of a 43°C .

16 **SI 3 Total HSF1:egfp expression level do not vary during experi-**  
17 **ments**

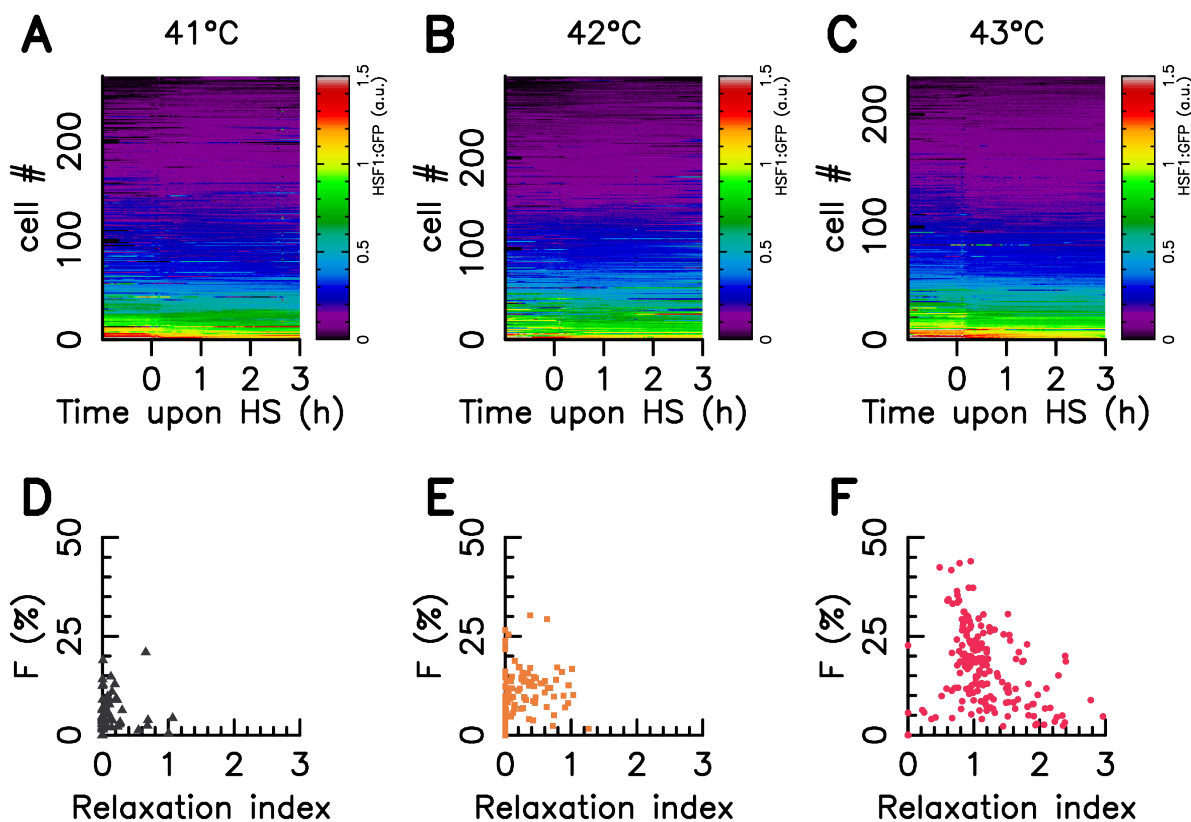

Figure SI 2: **Additional results of Figure 2 A-C** HSF1:eGFP fluorescence is monitored over time in single cell upon a 41°C 42°C and 43°C heat stress, time zero coincides with the stress onset. Each horizontal line corresponds to a single cell, a color code indicates the HSF1 fluorescence measured at a given time, according to the scale bar on the right. D-F Correlation between Fraction of HSF1 fluorescence within foci one hour after the stress onset and the relaxation index defined as the ratio of the foci intensity measure in a given cell at three hours after the stress onset to the one measured one hour after the stress onset.



18 **SI 4 High-throughput screening of Foci Dynamics with the use of**  
 19 **another HeLa cell line transfected with the same HSF1–**  
 20 **eGFP construct**

21 We check the influence of the transfection on the experimental result The experimental result display in Fig.  
 22 2 are confirmed by the use of another HeLa cell line transfected with the same HSF1–eGFP construct.

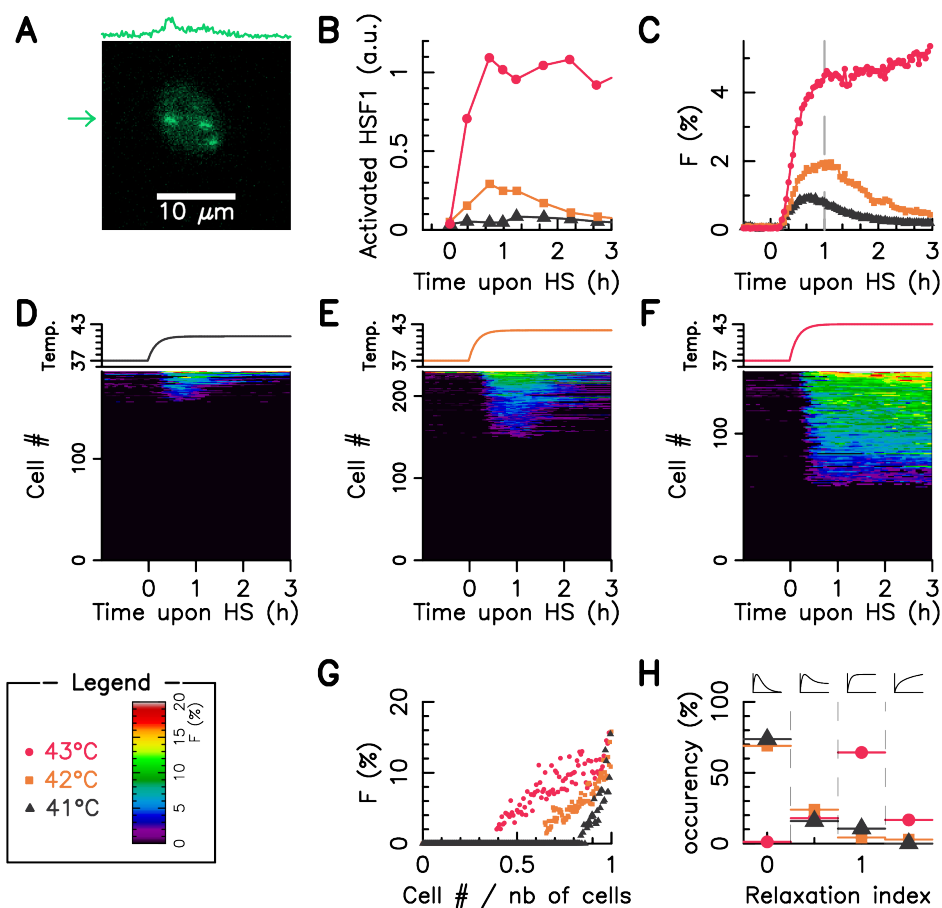

Figure SI 3: **High-throughput screening of Foci Dynamics in individual HeLa cells.** Result obtained with another HeLa cell line transfected with HSF1:eGFP construct. The fraction of HSF1-eGFP fluorescence is monitored over time in single cell upon a 41°C, 42°C, and 43°C heat stress, time zero coincides with the stress onset. A – A single HeLa HSF1:eGFP cell, 1 hour after the onset of the 43°C Heat stress with three visible Foci; the profile of intensity for the row indicated by the arrow is displayed on the top of the box. B – Dynamics of activated HSF1 as measured by Abravaya *et al.*. C – Average value over the cell population of foci intensity. D-F Cell temperature time profile (upper panel) and fraction of HSF1 fluorescence within foci in single cell (lower panel); in the color image, each horizontal line corresponds to a single-cell, a color code indicates the fraction of HSF1 fluorescence within foci measured at a given time. G – Fraction of HSF1 fluorescence within foci variation over the cell population one hour after the stress onset (cell ranking is similar to D-F). H – Statistical distribution of the relaxation index defined as the ratio of the foci intensity measure in a given cell at three hours after the stress onset to the one measured one hour after the stress onset. The legend box defines the used color code.

23 **SI 5 Model Parameter Estimation**

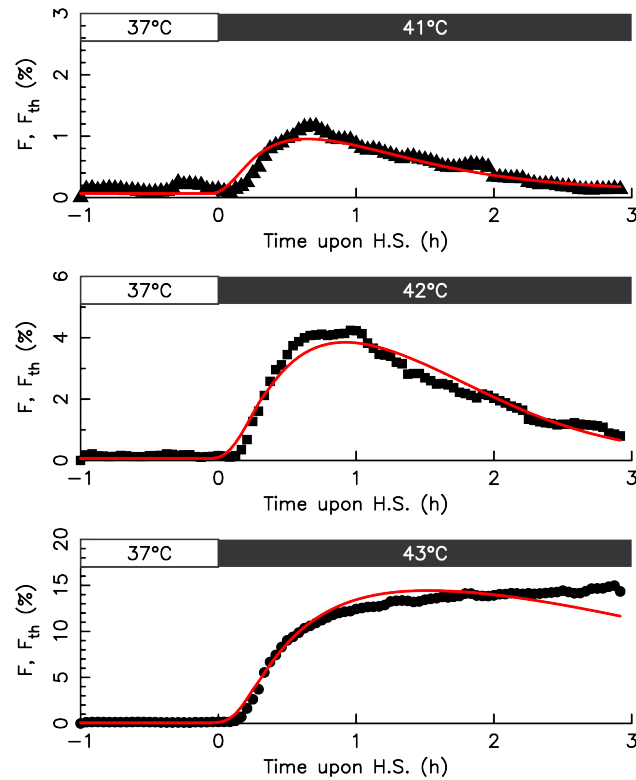

Figure SI 4: **Best adjustment of average foci value by the reduced model** Model output (red lines) and mean foci value (points). Time zero coincides with stress onset, the thermal protocol is indicated by bars on the top of each boxes. The root mean square deviation value 0.1 % for 41°C , 0.26 % for 42°C , 1.5 % for 43°C , and 0.9 % altogether.

Table SI 2: Estimated Parameter of the heat shock response network

| Parameter     | unit              | description                            | value                |
|---------------|-------------------|----------------------------------------|----------------------|
| $k_D$         | ( $\mu\text{M}$ ) | denaturation rate                      | 1.76                 |
| $k_r$         |                   | renaturation rate                      | 17.7                 |
| $\mu$         | ( $\mu\text{M}$ ) | HSP basal transcription rate           | $1.47 \cdot 10^{-3}$ |
| $\lambda$     | ( $\mu\text{M}$ ) | HSP active transcription rate          | 0.78                 |
| $S_0$         | ( $\mu\text{M}$ ) | HSP transcription regulation threshold | 0.18                 |
| $\beta$       |                   | HSP translation rate                   | 10                   |
| $H_0$         | ( $\mu\text{M}$ ) | translation regulation threshold       | 0.32                 |
| [HSF1]        | ( $\mu\text{M}$ ) | HSF1 concentration                     | $4.0 \cdot 10^{-2}$  |
| $\tau_{Temp}$ | (h)               | incubator rise time                    | 1/15.                |
| $\tau_{MFP}$  | (h)               | MFP lifetime                           | 0.5                  |
| $\tau_{mHSP}$ | (h)               | mHSP lifetime                          | 1                    |
| $\tau_{HSP}$  | (h)               | HSP lifetime time                      | 10                   |

24 **SI 6 Coarse-grain model of Foci Dynamics and variability – Ad-**  
25 **ditional results to Fig. 3**

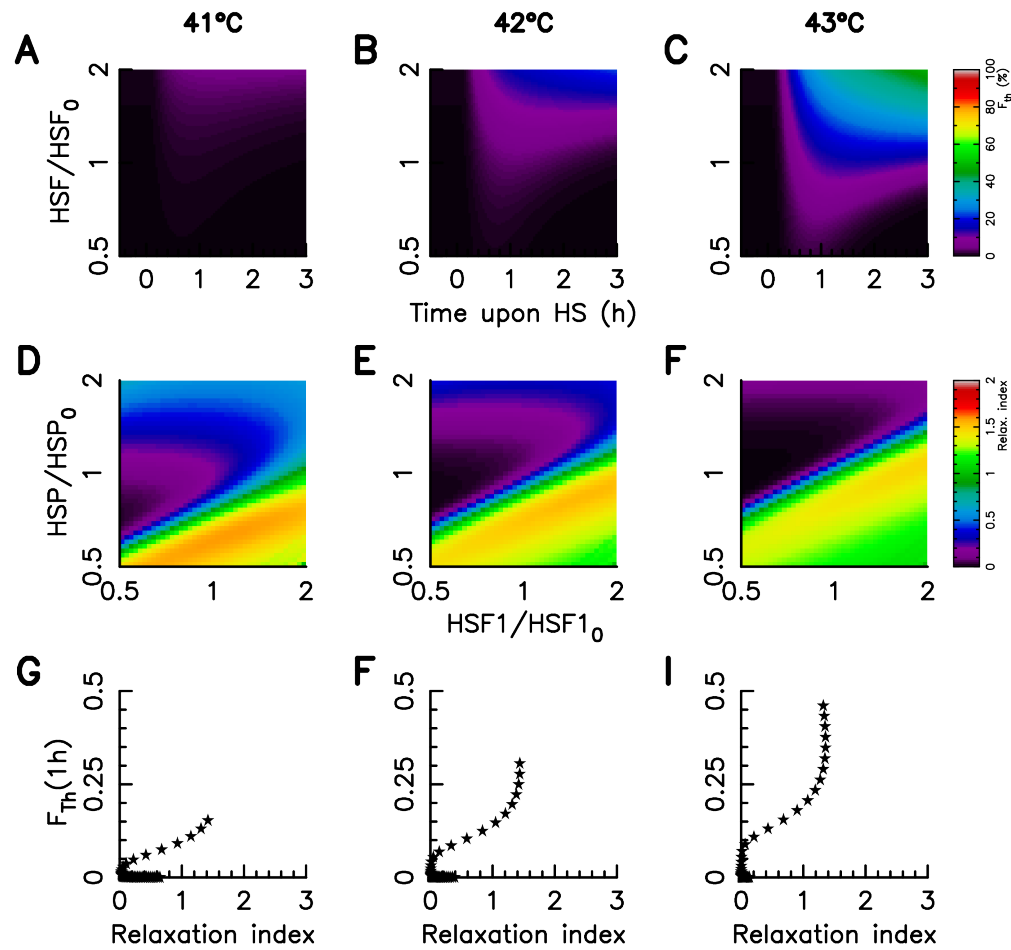

Figure SI 5: **Coarse-grain model of Foci Dynamics and variability – Additional results to Fig. 3**  
A–C Relaxation index value for varying HSP and HSF1 copy number in the case of a 41°C (A), 42°C (B),  
and 43°C (C) heat stress . D–F Correlation between Foci intensity one hour after the stress onset and the  
relaxation index upon a variation of HSP.

## 26 **SI 7 Chaperon protein HSP72 and HSC70 are log-normally dis-** 27 **tributed**

28 A random variable  $X$  follows a lognormal distribution of parameter  $(\mu, \sigma)$  if it's probability density function  
29 reads

$$\frac{1}{X \sigma \sqrt{2\pi}} \exp\left(-\frac{1}{2} \left(\frac{\log(X) - \mu}{\sigma}\right)^2\right). \quad (\text{SI 1})$$

30 The mean reads  $E(X) = e^{\mu + \sigma^2/2}$ .

## 31 **SI 8 IQR of the foci level variability description by HSP and HSF1**

## 32 **SI 9 Foci correlates with *HSP/HSF1***

## 33 **SI 10 HSP redundancy may be a strategy to reduced the cell-to-** 34 **cell variability**

35 The cell-to-cell variability of the foci response arise from two fact: (1) The sequestration mechanism un-  
36 derlying the heat stress response induce a high sensitivity to protein expression level (Fig. SI 9-A) (2) The  
37 stochastic expression of genes induce protein expression level distribution (Fig. SI 9-A). The heat shock  
38 protein 70 family contains numerous homologous chaperone proteins (at least height) and HSP72 (the stress  
39 inductive chaperone) as well as HSC70 (the constitutive chaperone) which are the major members of the  
40 family are log-normally distributed with a similar variance.

41 A question arise whether the HSP redundancy may be a strategy to reduced the cell-to-cell variability.  
42 To illustrate the phenomena, let us focus on the foci intensity one hour after a 43°C stress onset and compare  
43 two different cases. In the first case, the total pool of chaperon HSP is assumed to be build from a single  
44 gene and to follow a lognormal distribution of parameter  $(\mu, \sigma^2)$  (grey shade area in Fig. SI 9). In the second  
45 case, the total pool of chaperon HSP is assumed to be build from two distinct genes and then to be the  
46 sum of two homologous independent proteins, each of them following a lognormal distribution of parameter  
47  $(\mu', \sigma^2)$  and  $(\mu', \sigma^2)$  (red lines in Fig. SI 9). In both case, the parameters  $\mu$  and  $\mu'$  of the distribution are  
48 adjusted such as the mean of the total pool is unity, and the parameter  $\sigma$  is the same in all distributions. The  
49 duplication of chaperones in case two reduces by more than two the standard deviation of the foci intensity  
50 one hour after the stress onset.

## 51 SI 11 Model reduction

### 52 SI 1 Adiabatic elimination of dimer assembly and dis-assembly

53 Let A and B be two proteins, the equilibrium equation of reversible complex formation reaction  $A + B \leftrightarrow A:B$ :  
 54 B is written  $[A : B] k_0 = [A] \times [B]$  where  $k_0$  is a balance concentration. Straightforwardly, one gets

$$[A : B] = -\frac{a + b - k_0}{2} \left[ \sqrt{1 - \frac{4ab}{(a + b + k_0)^2}} - 1 \right] \quad (\text{SI 2})$$

55 where  $a = [A] + [A : B]$  and  $b = [B] + [A : B]$  stands for the total concentration of proteins specie A and B.  
 56 If now the chemical species concentration  $a$  and  $b$  dominates the equilibrium concentration  $k_0$  ( $a + b \gg k_0$ ),  
 57 parameter free rational functions approximate the concentration at equilibrium :

$$\begin{aligned} [A : B] &\simeq \frac{ab}{a + b} \\ [A] &\simeq \frac{a^2}{a + b} \\ [B] &\simeq \frac{b^2}{a + b} \end{aligned}$$

58 To reduce the mathematical model of the cellular heat shock response network, we consider that the  
 59 hetero-dimer assembly and disassembly follow the equilibrium relation at equilibrium for a given pool of  
 60 MFP, HSP, and HSF1, in a ordered reaction chain: firstly HSP binds MFP and secondly HSF1 bind the  
 61 remaining free HSP pool. Let us denote by  $[HSF1]_T$ ,  $[HSP]_T$ , and  $[MFP]_T$  the total concentration of  
 62 HSF1, HSP, and MFP then the conservation relations reads

$$\begin{aligned} [HSF1]_T &= [HSF1] + [HSP : HSF1] \\ [MFP]_T &= [MFP] + [HSP : MFP] \\ [HSP]_T &= [HSP] + [HSP : MFP] + [HSP : HSF1]. \end{aligned}$$

63 Once applied to the dominant hetero dimer reaction  $HSP + MFP \rightarrow MFP : HSP$  the adiabatic elimination  
 64 gives

$$\begin{aligned} [MFP] &= \frac{[MFP]_T^2}{[MFP]_T + [HSP]_T} \\ [MFP : HSP] &= \frac{[MFP]_T [HSP]_T}{[MFP]_T + [HSP]_T} \\ [HSP] &= \frac{[HSP]_T^2}{[MFP]_T + [HSP]_T} \end{aligned}$$

65 for the concentration of misfolded protein in free form, the hetero dimer MFP:HSP, and HSP in free form  
 66 before HSF1 binding. In a second time, we compute the equilibrium between HSF1 and the remaining HSP

67 in free form which leads to the expressions

$$\begin{aligned} [\text{HSF1}] &= \frac{[\text{HSF1}]_T^2}{[\text{HSF1}]_T + [\text{HSP}]} = \frac{[\text{HSF1}]_T^2}{[\text{HSF1}]_T + \frac{[\text{HSP}]_T^2}{[\text{MFP}]_T + [\text{HSP}]_T}} \\ [\text{HSP}] &= \frac{[\text{HSP}]^2}{[\text{HSF1}]_T + [\text{HSP}]} = \frac{\left(\frac{[\text{HSP}]_T^2}{[\text{MFP}]_T + [\text{HSP}]_T}\right)^2}{[\text{HSF1}]_T + \frac{[\text{HSP}]_T^2}{[\text{MFP}]_T + [\text{HSP}]_T}} \\ [\text{HSF1} : \text{HSP}] &= \frac{[\text{HSF1}] [\text{HSP}]}{[\text{HSF1}]_T + [\text{HSP}]} = \frac{[\text{HSF1}] \frac{[\text{HSP}]_T^2}{[\text{MFP}]_T + [\text{HSP}]_T}}{[\text{HSF1}]_T + \frac{[\text{HSP}]_T^2}{[\text{MFP}]_T + [\text{HSP}]_T}} \end{aligned}$$

68 In the reduce dynamical model 1, only  $[\text{HSF1}]_T$ ,  $[\text{HSP}]_T$ , or  $[\text{MFP}]_T$  appear as a protein concentration,  
69 the  $T$  subscript is thus removed for clarity.

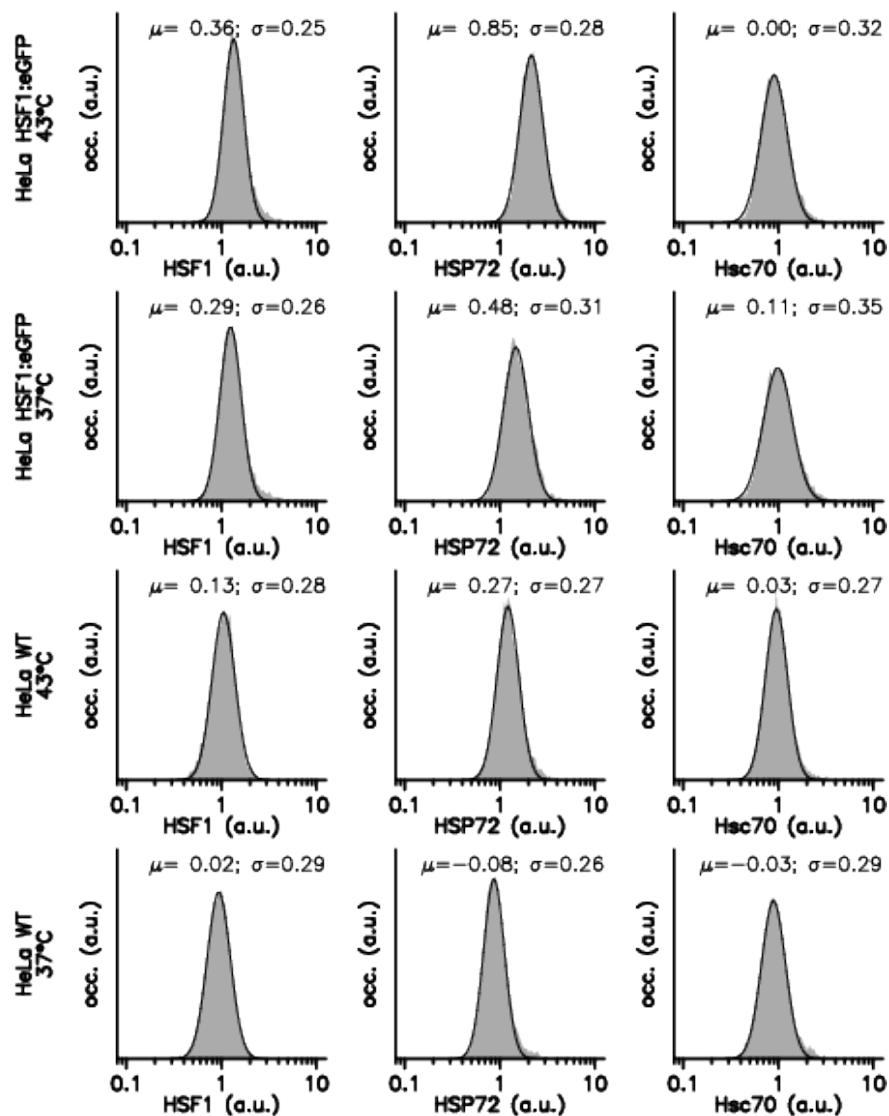

Figure SI 6: Protein level distributions. Protein expression distributions (grey shaded) are measured by Immuno-Fluorescence in HeLa Wild Type and HeLa-HSF1:eGFP cell lines for two thermal condition : at a 37°C temperature (black), at a 43°C temperature for one hour. The solid black lines correspond to best fitted lognormal distribution SI 1, estimated parameter values are written on the plot. Each line corresponds to a specific cell line and a specific thermal condition. Each column corresponds to a specific protein, HSF1, HSP72, and Hsc70. The distributions are normalised such that the mean in HeLa Wild Type at 37°C is unity.



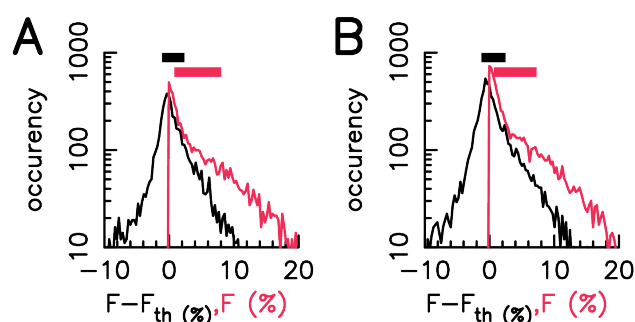

Figure SI 7: Black lines are histogram of the residuals between  $F$  and  $F_{Th}$  given by Eq. 8 using HSF1 and HSP72 (A) or HSF1 and HSC70 (B). Red lines are the histograms of  $F$  values. The filled square correspond to the IQR of the residual (black) or  $F$  value (red).

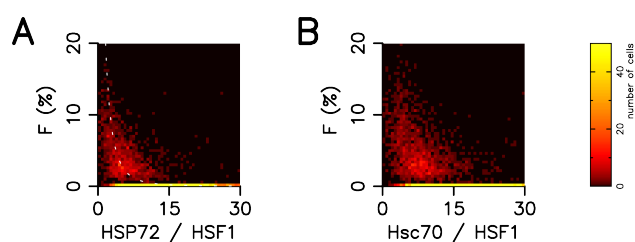

Figure SI 8: Cells distribution in HeLa-HSF1:eGFP as a function of Foci intensity (after 1 hour at 43°C ) and HSP72 to HSF1 ratio (A) or Hsc70 to HSF1 ratio (B). In (A), the white dot line correspond to the mathematical function  $y = 1/(1 + \alpha x)^3$  with  $\alpha = 0.45$

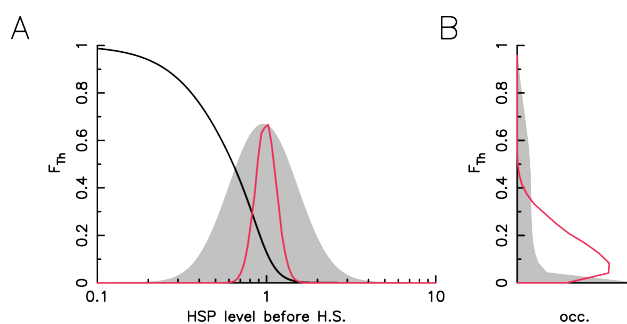

Figure SI 9: **Protein redundancy quench the foci variability** A – Foci intensity one hour after a 43°C heat stress onset as a function of initial HSP in the mathematical model (black line), HSP distribution before the heat stress in the case of one HSP species log-normally distributed (grey shade area) or two uncorrelated HSP species log-normally distributed (red line). B - Corresponding foci intensity distribution for one HSP species (grey shade area) and two HSP species (red line).
